# Supplementary material for: Probing machine learning models based on high throughput experimentation data for the discovery of asymmetric hydrogenation catalysts
Source: Royal Society of Chemistry journal article supplement (doi:10.1039/d4sc03647f), 2024-01-01
Supplement: d4sc03647f4.pdf [file d4sc03647f4.pdf]

## Definitive list of ligands (Oct '23)

| #  | Structure | Alias or name | CAS#        | Type | Formula                                                          | Eq. to Rh | M <sub>w</sub> [g mol <sup>-1</sup> ] | Vendor        | Catalog # |
|----|-----------|---------------|-------------|------|------------------------------------------------------------------|-----------|---------------------------------------|---------------|-----------|
| L1 |           | SL-J001-1     | 155806-35-2 | PP   | C <sub>36</sub> H <sub>44</sub> FeP <sub>2</sub>                 | 1.01      | 594.54                                | Sigma-Aldrich | 88717     |
| L2 |           | SL-J002-1     | 155830-69-6 | PP   | C <sub>32</sub> H <sub>40</sub> FeP <sub>2</sub>                 | 1.01      | 542.46                                | Sigma-Aldrich | 88719     |
| L3 |           | SL-J003-1     | 167416-28-6 | PP   | C <sub>36</sub> H <sub>56</sub> FeP <sub>2</sub>                 | 1.04      | 606.64                                | Sigma-Aldrich | 88721     |
| L4 |           | SL-J004-1     | 158923-09-2 | PP   | C <sub>36</sub> H <sub>44</sub> FeP <sub>2</sub>                 | 1.03      | 594.54                                | Sigma-Aldrich | 88723     |
| L5 |           | SL-J005-1     | 184095-69-0 | PP   | C <sub>40</sub> H <sub>40</sub> FeP <sub>2</sub>                 | 1.03      | 638.55                                | Sigma-Aldrich | 88725     |
| L6 |           | SL-J006-1     | 292638-88-1 | PP   | C <sub>40</sub> H <sub>40</sub> F <sub>12</sub> FeP <sub>2</sub> | 1.06      | 866.53                                | Sigma-Aldrich | 88727     |

| #   | Structure | Alias or name | CAS#        | Type | Formula                                                          | Eq. to Rh | M <sub>w</sub> [g mol <sup>-1</sup> ] | Vendor        | Catalog # |
|-----|-----------|---------------|-------------|------|------------------------------------------------------------------|-----------|---------------------------------------|---------------|-----------|
| L7  |           | SL-J007-1     | 360048-63-1 | PP   | C <sub>42</sub> H <sub>56</sub> FeO <sub>2</sub> P <sub>2</sub>  | 1.00      | 710.70                                | Sigma-Aldrich | 88729     |
| L8  |           | SL-J008-1     | 166172-63-0 | PP   | C <sub>44</sub> H <sub>36</sub> F <sub>12</sub> FeP <sub>2</sub> | 1.03      | 910.55                                | Sigma-Aldrich | 88731     |
| L9  |           | SL-J009-1     | 158923-11-6 | PP   | C <sub>32</sub> H <sub>52</sub> FeP <sub>2</sub>                 | 1.03      | 554.56                                | Sigma-Aldrich | 88733     |
| L10 |           | SL-J011-1     | 246231-79-8 | PP   | C <sub>34</sub> H <sub>38</sub> F <sub>6</sub> FeP <sub>2</sub>  | 1.04      | 678.46                                | Sigma-Aldrich | 88735     |
| L11 |           | SL-J013-1     | 187733-50-2 | PP   | C <sub>38</sub> H <sub>52</sub> FeO <sub>2</sub> P <sub>2</sub>  | 1.03      | 658.62                                | Sigma-Aldrich | 88737     |
| L12 |           | SL-J212-1     | 849924-41-0 | PP   | C <sub>28</sub> H <sub>36</sub> FeO <sub>2</sub> P <sub>2</sub>  | 1.08      | 522.39                                | abcr          | AB426473  |
| L13 |           | SL-J404-1     | 851308-40-2 | PP   | C <sub>48</sub> H <sub>44</sub> FeP <sub>2</sub>                 | 1.03      | 738.67                                | STREM         | 26-1175   |

| #   | Structure | Alias or name | CAS#        | Type | Formula                                                         | Eq. to Rh | M <sub>w</sub> [g mol <sup>-1</sup> ] | Vendor        | Catalog # |
|-----|-----------|---------------|-------------|------|-----------------------------------------------------------------|-----------|---------------------------------------|---------------|-----------|
| L14 |           | SL-J418-1     | 849924-45-4 | PP   | C <sub>46</sub> H <sub>52</sub> FeO <sub>2</sub> P <sub>2</sub> | 1.03      | 754.71                                | Sigma-Aldrich | 88747     |
| L15 |           | SL-J452-1     | 849924-73-8 | PP   | C <sub>34</sub> H <sub>32</sub> FeO <sub>2</sub> P <sub>2</sub> | 1.05      | 590.42                                | Sigma-Aldrich | 88751     |
| L16 |           | SL-J502-1     | 223120-71-6 | PP   | C <sub>32</sub> H <sub>40</sub> FeP <sub>2</sub>                | 1.06      | 542.46                                | Sigma-Aldrich | 88753     |
| L17 |           | (R)-BINAM-P   | 74974-14-4  | PP   | C <sub>44</sub> H <sub>34</sub> N <sub>2</sub> P <sub>2</sub>   | 1.02      | 652.72                                | Sigma-Aldrich | 708615    |
| L18 |           | SL-J505-1     | 849924-76-1 | PP   | C <sub>34</sub> H <sub>44</sub> FeP <sub>2</sub>                | 1.07      | 570.52                                | Sigma-Aldrich | 88755     |
| L19 |           | SL-T002-2     | 914089-00-2 | PP   | C <sub>43</sub> H <sub>63</sub> FeNP <sub>2</sub>               | 1.01      | 711.78                                | Sigma-Aldrich | 07542     |
| L20 |           | SL-M001-1     | 174467-31-3 | PP   | C <sub>52</sub> H <sub>50</sub> FeN <sub>2</sub> P <sub>2</sub> | 1.03      | 820.78                                | Sigma-Aldrich | 73463     |

| #   | Structure                                                                           | Alias or name | CAS#                             | Type | Formula                                                                         | Eq. to Rh | M <sub>w</sub> [g mol <sup>-1</sup> ] | Vendor        | Catalog # |
|-----|-------------------------------------------------------------------------------------|---------------|----------------------------------|------|---------------------------------------------------------------------------------|-----------|---------------------------------------|---------------|-----------|
| L21 | 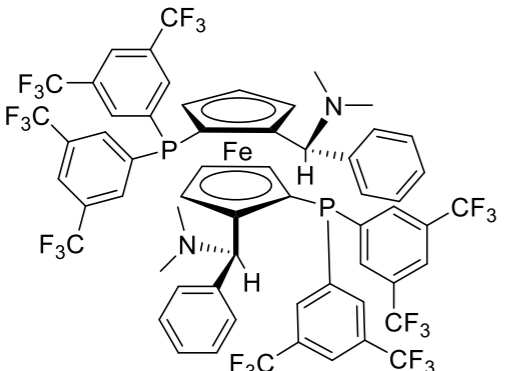   | SL-M003-1     | 494227-36-0                      | PP   | C <sub>60</sub> H <sub>42</sub> F <sub>24</sub> FeN <sub>2</sub> P <sub>2</sub> | 1.02      | 1364.76                               | Sigma-Aldrich | 73467     |
| L22 |    | SL-M004-1     | 494227-37-1                      | PP   | C <sub>64</sub> H <sub>74</sub> FeN <sub>2</sub> O <sub>4</sub> P <sub>2</sub>  | 1.04      | 1053.10                               | Sigma-Aldrich | 73469     |
| L23 |   | SL-M009-1     | 793718-16-8                      | PP   | C <sub>60</sub> H <sub>66</sub> FeN <sub>2</sub> P <sub>2</sub>                 | 1.01      | 932.99                                | Sigma-Aldrich | 73471     |
| L24 |  | SL-T001-2     | 850444-36-9                      | PP   | C <sub>43</sub> H <sub>39</sub> FeNP <sub>2</sub>                               | 1.03      | 687.58                                | Sigma-Aldrich | 73476     |
| L25 |  | SL-W001-1     | 565184-33-0<br>(AKA 387868-06-6) | PP   | C <sub>46</sub> H <sub>32</sub> F <sub>12</sub> FeP <sub>2</sub>                | 1.05      | 930.54                                | Sigma-Aldrich | 65671     |
| L26 |  | SL-W002-1     | 388079-58-1                      | PP   | C <sub>42</sub> H <sub>36</sub> FeP <sub>2</sub>                                | 1.08      | 658.54                                | Sigma-Aldrich | 65673     |

| #   | Structure                                                                           | Alias or name | CAS#        | Type | Formula                                                                         | Eq. to Rh | M <sub>w</sub> [g mol <sup>-1</sup> ] | Vendor        | Catalog # |
|-----|-------------------------------------------------------------------------------------|---------------|-------------|------|---------------------------------------------------------------------------------|-----------|---------------------------------------|---------------|-----------|
| L27 | 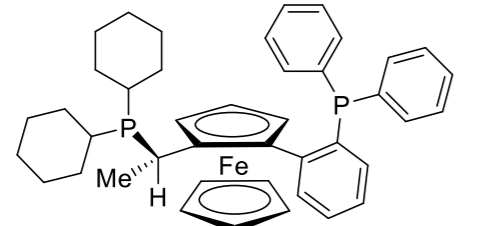   | SL-W003-2     | 849925-19-5 | PP   | C <sub>42</sub> H <sub>48</sub> FeP <sub>2</sub>                                | 1.06      | 670.64                                | Sigma-Aldrich | 65676     |
| L28 |    | SL-W005-2     | 849925-20-8 | PP   | C <sub>52</sub> H <sub>44</sub> F <sub>12</sub> FeO <sub>2</sub> P <sub>2</sub> | 1.02      | 1046.70                               | Sigma-Aldrich | 65678     |
| L29 |    | SL-W008-2     | 849925-22-0 | PP   | C <sub>46</sub> H <sub>44</sub> F <sub>12</sub> FeP <sub>2</sub>                | 1.07      | 942.63                                | Sigma-Aldrich | 65682     |
| L30 |   | SL-W009-1     | 894771-28-9 | PP   | C <sub>50</sub> H <sub>52</sub> FeP <sub>2</sub>                                | 1.02      | 770.76                                | STREM         | 26-1555   |
| L31 |  | SL-F356-1     | 952586-19-5 | PP   | C <sub>42</sub> H <sub>53</sub> Fe <sub>2</sub> NP <sub>2</sub>                 | 1.04      | 745.53                                | Sigma-Aldrich | 779075    |
| L32 |  | (R)-BINAP     | 76189-55-4  | PP   | C <sub>44</sub> H <sub>32</sub> P <sub>2</sub>                                  | 1.09      | 622.69                                | Sigma-Aldrich | 693065    |

| #   | Structure | Alias or name                                         | CAS#         | Type | Formula                                                                       | Eq. to Rh | M <sub>w</sub> [g mol <sup>-1</sup> ] | Vendor        | Catalog # |
|-----|-----------|-------------------------------------------------------|--------------|------|-------------------------------------------------------------------------------|-----------|---------------------------------------|---------------|-----------|
| L33 |           | ( <i>R</i> )-BTM-GarPhos                              | 1365531-84-5 | PP   | C <sub>48</sub> H <sub>28</sub> F <sub>24</sub> O <sub>4</sub> P <sub>2</sub> | 1.07      | 1186.66                               | STREM         | 15-1663   |
| L34 |           | ( <i>R</i> )-Tol-BINAP                                | 99646-28-3   | PP   | C <sub>48</sub> H <sub>40</sub> P <sub>2</sub>                                | 1.04      | 678.80                                | Sigma-Aldrich | 693049    |
| L35 |           | ( <i>R</i> )-Xyl-BINAP<br>(AKA ( <i>R</i> )-DM-BINAP) | 137219-86-4  | PP   | C <sub>52</sub> H <sub>48</sub> P <sub>2</sub>                                | 1.05      | 734.90                                | Sigma-Aldrich | 692379    |
| L36 |           | ( <i>R</i> )-H <sub>8</sub> -BINAP                    | 139139-86-9  | PP   | C <sub>44</sub> H <sub>40</sub> P <sub>2</sub>                                | 1.09      | 630.75                                | Sigma-Aldrich | 692387    |
| L37 |           | ( <i>S</i> )-SegPhos                                  | 210169-54-3  | PP   | C <sub>38</sub> H <sub>28</sub> O <sub>4</sub> P <sub>2</sub>                 | 1.09      | 610.59                                | Sigma-Aldrich | 693006    |

| #   | Structure                                                                           | Alias or name                           | CAS#        | Type | Formula                                                                       | Eq. to Rh | M <sub>w</sub> [g mol <sup>-1</sup> ] | Vendor        | Catalog # |
|-----|-------------------------------------------------------------------------------------|-----------------------------------------|-------------|------|-------------------------------------------------------------------------------|-----------|---------------------------------------|---------------|-----------|
| L38 | 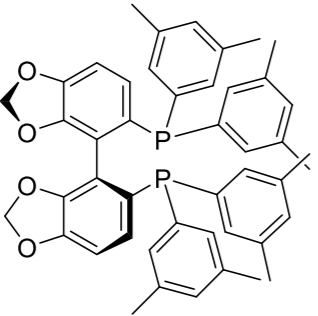   | (S)-Xyl-SegPhos<br>(AKA (S)-DM-SegPhos) | 210169-57-6 | PP   | C <sub>46</sub> H <sub>44</sub> O <sub>4</sub> P <sub>2</sub>                 | 1.05      | 722.80                                | Sigma-Aldrich | 692999    |
| L39 |    | (S)-DTBM-SegPhos                        | 210169-40-7 | PP   | C <sub>74</sub> H <sub>100</sub> O <sub>8</sub> P <sub>2</sub>                | 1.09      | 1179.55                               | Sigma-Aldrich | 692980    |
| L40 |   | (R)-Cl-MeO-BIPHEP                       | 185913-97-7 | PP   | C <sub>38</sub> H <sub>30</sub> Cl <sub>2</sub> O <sub>2</sub> P <sub>2</sub> | 1.00      | 651.50                                | Sigma-Aldrich | 96738     |
| L41 |  | SL-A109-1                               | 352655-61-9 | PP   | C <sub>74</sub> H <sub>104</sub> O <sub>6</sub> P <sub>2</sub>                | 1.01      | 1151.59                               | Sigma-Aldrich | 29512     |
| L42 |  | SL-A120-1                               | 394248-45-4 | PP   | C <sub>46</sub> H <sub>48</sub> O <sub>2</sub> P <sub>2</sub>                 | 1.07      | 694.84                                | Sigma-Aldrich | 29516     |

| #   | Structure | Alias or name | CAS#        | Type | Formula                                                                       | Eq. to Rh | M <sub>w</sub> [g mol <sup>-1</sup> ] | Vendor        | Catalog # |
|-----|-----------|---------------|-------------|------|-------------------------------------------------------------------------------|-----------|---------------------------------------|---------------|-----------|
| L43 |           | SL-A107-1     | 352655-40-4 | PP   | C <sub>70</sub> H <sub>100</sub> N <sub>4</sub> O <sub>2</sub> P <sub>2</sub> | 1.02      | 1091.54                               | Sigma-Aldrich | 29528     |
| L44 |           | SL-A108-2     | 145214-59-1 | PP   | C <sub>30</sub> H <sub>24</sub> O <sub>6</sub> P <sub>2</sub>                 | 1.08      | 542.46                                | Sigma-Aldrich | 29515     |
| L45 |           | SL-A102-2     | 133545-25-2 | PP   | C <sub>42</sub> H <sub>40</sub> O <sub>2</sub> P <sub>2</sub>                 | 1.01      | 638.73                                | Sigma-Aldrich | 29521     |
| L46 |           | SL-A121-1     | 192138-05-9 | PP   | C <sub>70</sub> H <sub>96</sub> O <sub>2</sub> P <sub>2</sub>                 | 1.10      | 1031.48                               | Sigma-Aldrich | 29524     |
| L47 |           | SL-A104-1     | 256390-47-3 | PP   | C <sub>50</sub> H <sub>56</sub> O <sub>14</sub> P <sub>2</sub>                | 1.05      | 942.93                                | Sigma-Aldrich | 29526     |



| #   | Structure | Alias or name                | CAS#         | Type | Formula                                                        | Eq. to Rh | M <sub>w</sub> [g mol <sup>-1</sup> ] | Vendor        | Catalog # |
|-----|-----------|------------------------------|--------------|------|----------------------------------------------------------------|-----------|---------------------------------------|---------------|-----------|
| L48 |           | (R)-GarPhos                  | 1365531-75-4 | PP   | C <sub>40</sub> H <sub>36</sub> O <sub>4</sub> P <sub>2</sub>  | 1.06      | 642.67                                | Sigma-Aldrich | 754927    |
| L49 |           | (R)-Xyl-GarPhos              | 1365531-89-0 | PP   | C <sub>48</sub> H <sub>52</sub> O <sub>4</sub> P <sub>2</sub>  | 1.00      | 754.89                                | Sigma-Aldrich | 761389    |
| L50 |           | (R)-DTBM-GarPhos             | 1365531-98-1 | PP   | C <sub>76</sub> H <sub>108</sub> O <sub>8</sub> P <sub>2</sub> | 1.03      | 1211.64                               | Sigma-Aldrich | 761419    |
| L51 |           | (S)-iPr-BIPHEP               | 150971-43-0  | PP   | C <sub>26</sub> H <sub>40</sub> O <sub>2</sub> P <sub>2</sub>  | 1.03      | 446.55                                | STREM         | 15-0655   |
| L52 |           | (R)-C <sub>3</sub> -TunePhos | 301847-89-2  | PP   | C <sub>39</sub> H <sub>32</sub> O <sub>2</sub> P <sub>2</sub>  | 1.05      | 594.63                                | STREM         | 15-0175   |
| L53 |           | (S,S)-iPr-BPE                | 528854-34-4  | PP   | C <sub>22</sub> H <sub>44</sub> P <sub>2</sub>                 | 1.07      | 370.54                                | Sigma-Aldrich | 668435    |

| #   | Structure | Alias or name                                          | CAS#        | Type            | Formula                                                                       | Eq. to Rh | M <sub>w</sub> [g mol <sup>-1</sup> ] | Vendor        | Catalog # |
|-----|-----------|--------------------------------------------------------|-------------|-----------------|-------------------------------------------------------------------------------|-----------|---------------------------------------|---------------|-----------|
| L54 |           | ( <i>R,R,R</i> )-SPIRAP<br>(AKA ( <i>R</i> )-CrabPhos) | NA          | PP              | C <sub>43</sub> H <sub>38</sub> O <sub>2</sub> P <sub>2</sub>                 | 1.03      | 648.72                                | Sigma-Aldrich | 905240    |
| L55 |           | ( <i>R,R,S,S</i> )-DuanPhos                            | 528814-26-8 | PP              | C <sub>24</sub> H <sub>32</sub> P <sub>2</sub>                                | 1.09      | 382.46                                | Sigma-Aldrich | 657697    |
| L56 |           | ( <i>R,R</i> )-DIPAMP                                  | 55739-58-7  | PP              | C <sub>28</sub> H <sub>28</sub> O <sub>2</sub> P <sub>2</sub>                 | 1.06      | 458.48                                | Sigma-Aldrich | 697761    |
| L57 |           | ( <i>R</i> )- <i>i</i> Pr-PHOX                         | 164858-78-0 | PN              | C <sub>24</sub> H <sub>24</sub> NOP                                           | 1.09      | 373.44                                | Sigma-Aldrich | 72575     |
| L58 |           | SL-F131-1<br>(AKA Trifer)                              | 899811-43-9 | PP              | C <sub>50</sub> H <sub>54</sub> Fe <sub>3</sub> N <sub>2</sub> P <sub>2</sub> | 1.03      | 912.48                                | STREM         | 26-1260   |
| L59 |           | ( <i>R</i> )-Xyl-SDP                                   | 917377-75-4 | PP              | C <sub>49</sub> H <sub>50</sub> P <sub>2</sub>                                | 1.04      | 700.89                                | STREM         | 15-5168   |
| L60 |           | ( <i>S</i> )-DM-MonoPhos                               | 185449-86-9 | Phosphoramidite | C <sub>24</sub> H <sub>22</sub> NO <sub>2</sub> P                             | 2.00      | 387.42                                | STREM         | 15-1255   |

| #   | Structure                                                                           | Alias or name                  | CAS#         | Type            | Formula                                                       | Eq. to Rh | M <sub>w</sub> [g mol <sup>-1</sup> ] | Vendor        | Catalog # |
|-----|-------------------------------------------------------------------------------------|--------------------------------|--------------|-----------------|---------------------------------------------------------------|-----------|---------------------------------------|---------------|-----------|
| L61 | 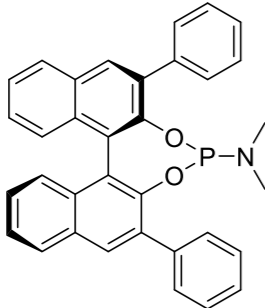   | (R)-Ph-MonoPhos                | 936010-61-6  | Phosphoramidite | C <sub>34</sub> H <sub>26</sub> NO <sub>2</sub> P             | 2.00      | 511.56                                | STREM         | 15-5620   |
| L62 |    | (S)-NEt <sub>2</sub> -MonoPhos | 252288-04-3  | Phosphoramidite | C <sub>24</sub> H <sub>22</sub> NO <sub>2</sub> P             | 2.00      | 387.42                                | STREM         | 15-1231   |
| L63 |    | (R,R,R)-Xyl-SKP                | 1429939-35-4 | PP              | C <sub>52</sub> H <sub>54</sub> O <sub>2</sub> P <sub>2</sub> | 1.03      | 772.95                                | STREM         | 15-4320   |
| L64 |   | (R,R)-Ph-BPE                   | 528565-79-9  | PP              | C <sub>34</sub> H <sub>36</sub> P <sub>2</sub>                | 1.09      | 506.61                                | Sigma-Aldrich | 667811    |
| L65 |  | (S,S)-ChiraPhos                | 64896-28-2   | PP              | C <sub>28</sub> H <sub>28</sub> P <sub>2</sub>                | 1.04      | 426.48                                | Sigma-Aldrich | 259098    |
| L66 |  | (R,R)-Et-BPE                   | 136705-62-9  | PP              | C <sub>18</sub> H <sub>36</sub> P <sub>2</sub>                | 1.06      | 314.43                                | Sigma-Aldrich | 668478    |
| L67 |  | (R)-QuinoxP                    | 866081-62-1  | PP              | C <sub>18</sub> H <sub>28</sub> N <sub>2</sub> P <sub>2</sub> | 1.06      | 334.38                                | Sigma-Aldrich | 676403    |

| #   | Structure                                                                           | Alias or name                        | CAS#         | Type | Formula                                           | Eq. to Rh | M <sub>w</sub> [g mol <sup>-1</sup> ] | Vendor        | Catalog # |
|-----|-------------------------------------------------------------------------------------|--------------------------------------|--------------|------|---------------------------------------------------|-----------|---------------------------------------|---------------|-----------|
| L68 | 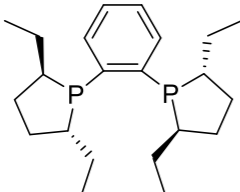   | ( <i>R,R</i> )-Et-DuPhos             | 136705-64-1  | PP   | C <sub>22</sub> H <sub>36</sub> P <sub>2</sub>    | 1.04      | 362.48                                | Sigma-Aldrich | 668494    |
| L69 |    | ( <i>R,R</i> )-Me-DuPhos             | 147253-67-6  | PP   | C <sub>18</sub> H <sub>28</sub> P <sub>2</sub>    | 1.08      | 306.37                                | Sigma-Aldrich | 665258    |
| L70 |    | ( <i>S</i> )-PhanePhos               | 192463-40-4  | PP   | C <sub>40</sub> H <sub>34</sub> P <sub>2</sub>    | 1.09      | 576.66                                | Sigma-Aldrich | 682136    |
| L71 |   | ( <i>S</i> )-Me <sup>i</sup> Pr-PHOX | 1152313-76-2 | PN   | C <sub>26</sub> H <sub>28</sub> NOP               | 1.05      | 401.49                                | Sigma-Aldrich | 719641    |
| L72 |  | SL-N003-2                            | 163169-29-7  | PN   | C <sub>28</sub> H <sub>28</sub> FeNOP             | 1.09      | 481.36                                | Sigma-Aldrich | 717398    |
| L73 |  | ( <i>S</i> )-NeoPHOX                 | 1199225-38-1 | PN   | C <sub>22</sub> H <sub>28</sub> NOP               | 1.05      | 353.45                                | Sigma-Aldrich | 729264    |
| L74 |  | ( <i>R,S</i> )-Me-BoPhoz             | 406680-94-2  | PP   | C <sub>37</sub> H <sub>35</sub> FeNP <sub>2</sub> | 1.06      | 611.49                                | Sigma-Aldrich | 682322    |

| #   | Structure                                                                           | Alias or name              | CAS#        | Type | Formula                                                       | Eq. to Rh | M <sub>w</sub> [g mol <sup>-1</sup> ] | Vendor        | Catalog # |
|-----|-------------------------------------------------------------------------------------|----------------------------|-------------|------|---------------------------------------------------------------|-----------|---------------------------------------|---------------|-----------|
| L75 | 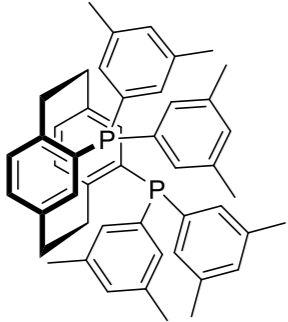   | ( <i>R</i> )-Xyl-PhanePhos | 325168-89-6 | PP   | C <sub>48</sub> H <sub>50</sub> P <sub>2</sub>                | 1.08      | 688.88                                | Sigma-Aldrich | 682306    |
| L76 |    | ( <i>S,S</i> )-f-Binaphane | 544461-38-3 | PP   | C <sub>54</sub> H <sub>40</sub> FeP <sub>2</sub>              | 1.09      | 806.71                                | STREM         | 26-0243   |
| L77 |    | ( <i>R,R</i> )-BDPP        | 96183-46-9  | PP   | C <sub>29</sub> H <sub>30</sub> P <sub>2</sub>                | 1.09      | 440.51                                | STREM         | 15-0432   |
| L78 |   | ( <i>R,R</i> )-NorPhos     | 71042-55-2  | PP   | C <sub>31</sub> H <sub>28</sub> P <sub>2</sub>                | 1.09      | 462.51                                | STREM         | 15-0140   |
| L79 |  | ( <i>R,S</i> )-BPPFA       | 74311-56-1  | PP   | C <sub>38</sub> H <sub>37</sub> FeNP <sub>2</sub>             | 1.06      | 625.51                                | Sigma-Aldrich | 344087    |
| L80 |  | ( <i>R,R</i> )-DIOP        | 32305-98-9  | PP   | C <sub>31</sub> H <sub>32</sub> O <sub>2</sub> P <sub>2</sub> | 1.07      | 498.54                                | Sigma-Aldrich | 237655    |

| #   | Structure | Alias or name        | CAS#         | Type | Formula                                                       | Eq. to Rh | M <sub>w</sub> [g mol <sup>-1</sup> ] | Vendor        | Catalog # |
|-----|-----------|----------------------|--------------|------|---------------------------------------------------------------|-----------|---------------------------------------|---------------|-----------|
| L81 |           | (S)-Tol-'Bu-PHOX     | 218460-00-5  | PN   | C <sub>27</sub> H <sub>30</sub> NOP                           | 1.10      | 415.52                                | Sigma-Aldrich | 688533    |
| L82 |           | (S,S)-DPE-Phos       | 2119686-55-2 | PP   | C <sub>38</sub> H <sub>32</sub> O <sub>3</sub> P <sub>2</sub> | 1.06      | 598.62                                | STREM         | 15-1279   |
| L83 |           | (S)-NMDPP            | 43077-29-8   | P    | C <sub>22</sub> H <sub>29</sub> P                             | 2.00      | 324.45                                | STREM         | 15-3490   |
| L84 |           | (S,S)-BABIBOP        | 2207601-04-3 | PP   | C <sub>22</sub> H <sub>28</sub> O <sub>2</sub> P <sub>2</sub> | 1.03      | 386.41                                | STREM         | 15-6410   |
| L85 |           | (S,S,S,S)-Me-BABIBOP | 2207601-10-1 | PP   | C <sub>24</sub> H <sub>32</sub> O <sub>2</sub> P <sub>2</sub> | 1.06      | 414.47                                | STREM         | 15-6420   |
| L86 |           | (S,S,S,S)-Pr-BABIBOP | 2207601-12-3 | PP   | C <sub>28</sub> H <sub>40</sub> O <sub>2</sub> P <sub>2</sub> | 1.08      | 470.57                                | STREM         | 15-6430   |
| L87 |           | (R,R,R,R)-Bis-BIDIME | 1884680-48-1 | PP   | C <sub>38</sub> H <sub>44</sub> O <sub>6</sub> P <sub>2</sub> | 1.03      | 658.71                                | STREM         | 15-6240   |
| L88 |           | (R,R)-PPM            | 77450-05-6   | PP   | C <sub>29</sub> H <sub>29</sub> NP <sub>2</sub>               | 1.05      | 453.51                                | STREM         | 15-7210   |

| #   | Structure                                                                           | Alias or name                      | CAS#        | Type | Formula                                                                                      | Eq. to Rh | M <sub>w</sub> [g mol <sup>-1</sup> ] | Vendor        | Catalog # |
|-----|-------------------------------------------------------------------------------------|------------------------------------|-------------|------|----------------------------------------------------------------------------------------------|-----------|---------------------------------------|---------------|-----------|
| L89 | 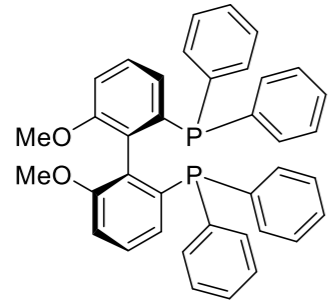   | SL-A101-1                          | 133545-16-1 | PP   | C <sub>38</sub> H <sub>32</sub> O <sub>2</sub> P <sub>2</sub>                                | 1.03      | 582.62                                | Sigma-Aldrich | 29510     |
| L90 |    | (S)-MeO-F <sub>12</sub> -BIPHEP    | 116008-37-6 | PP   | C <sub>38</sub> H <sub>20</sub> F <sub>12</sub> O <sub>2</sub> P <sub>2</sub>                | 1.06      | 798.50                                | Kanto         | 25971-95  |
| L91 |   | (R)-MeO-F <sub>16</sub> -BIPHEP    | NA          | PP   | C <sub>42</sub> H <sub>24</sub> F <sub>16</sub> O <sub>2</sub> P <sub>2</sub>                | 1.03      | 926.57                                | Kanto         | 2022-008K |
| L92 |  | (R)-MeO-Py-F <sub>12</sub> -BIPHEP | NA          | PP   | C <sub>38</sub> H <sub>24</sub> F <sub>12</sub> N <sub>4</sub> O <sub>2</sub> P <sub>2</sub> | 1.06      | 858.56                                | Kanto         | 2022-009K |
| L93 |  | (R)-MeO-F <sub>20</sub> -BIPHEP    | NA          | PP   | C <sub>42</sub> H <sub>20</sub> F <sub>20</sub> O <sub>2</sub> P <sub>2</sub>                | 1.02      | 998.54                                | Kanto         | 2022-010K |

| #   | Structure | Alias or name                                             | CAS#        | Type | Formula                                                                                      | Eq. to Rh | M <sub>w</sub> [g mol <sup>-1</sup> ] | Vendor                   | Catalog # |
|-----|-----------|-----------------------------------------------------------|-------------|------|----------------------------------------------------------------------------------------------|-----------|---------------------------------------|--------------------------|-----------|
| L94 |           | (R)-MeO-BFPy-BIPHEP                                       | NA          | PP   | C <sub>42</sub> H <sub>20</sub> F <sub>24</sub> N <sub>4</sub> O <sub>2</sub> P <sub>2</sub> | 1.03      | 1130.56                               | Kanto                    | 2022-011K |
| L95 |           | (S,S)-XylSKEWPhos                                         | 551950-92-6 | PP   | C <sub>37</sub> H <sub>46</sub> P <sub>2</sub>                                               | 1.08      | 552.72                                | Kanto                    | 05843-68  |
| L96 |           | (S,S)-DIPSKEWPhos                                         | NA          | PP   | C <sub>53</sub> H <sub>78</sub> P <sub>2</sub>                                               | 1.10      | 777.15                                | Kanto                    | 05845-55  |
| L97 |           | SL-W022-1                                                 | 849925-29-7 | PP   | C <sub>44</sub> H <sub>48</sub> FeP <sub>2</sub>                                             | 1.08      | 694.66                                | Santa Cruz Biotechnology | sc-237419 |
| L98 |           | catASium D(R)                                             | 99135-95-2  | PP   | C <sub>35</sub> H <sub>33</sub> NP <sub>2</sub>                                              | 1.02      | 529.60                                | abcr                     | AB152827  |
| L99 |           | (2R)-1-[(1S)-1-Aminoethyl]-2-(diphenylphosphino)ferrocene | 607389-84-4 | PN   | C <sub>24</sub> H <sub>24</sub> FeNP                                                         | 1.07      | 413.28                                | abcr                     | AB268697  |



| #    | Structure                                                                           | Alias or name                              | CAS#         | Type            | Formula                                                                      | Eq. to Rh | M <sub>w</sub> [g mol <sup>-1</sup> ] | Vendor        | Catalog # |
|------|-------------------------------------------------------------------------------------|--------------------------------------------|--------------|-----------------|------------------------------------------------------------------------------|-----------|---------------------------------------|---------------|-----------|
| L100 | 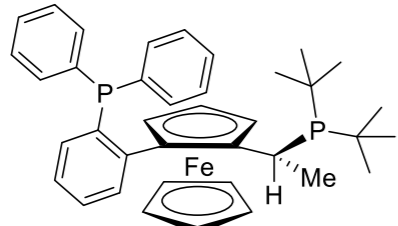   | SL-W012-1                                  | 565184-30-7  | PP              | C <sub>38</sub> H <sub>44</sub> FeP <sub>2</sub>                             | 1.06      | 618.56                                | abcr          | AB426507  |
| L101 |    | SL-W030-1                                  | 1854067-62-1 | PP              | C <sub>34</sub> H <sub>52</sub> FeP <sub>2</sub>                             | 1.03      | 578.58                                | abcr          | AB426511  |
| L102 |    | (S,S)-Et-FerroTANE                         | 290347-66-9  | PP              | C <sub>24</sub> H <sub>36</sub> FeP <sub>2</sub>                             | 1.09      | 442.34                                | abcr          | AB131607  |
| L103 |   | SL-W029-1                                  | 1854067-50-7 | PP              | C <sub>38</sub> H <sub>56</sub> FeP <sub>2</sub>                             | 1.06      | 630.66                                | abcr          | AB426509  |
| L104 |  | (R)-MonoPhos                               | 157488-65-8  | Phosphoramidite | C <sub>22</sub> H <sub>18</sub> NO <sub>2</sub> P                            | 2.02      | 359.36                                | Sigma-Aldrich | 668206    |
| L105 |  | SL-F103-1                                  | 55700-44-2   | PN              | C <sub>26</sub> H <sub>28</sub> FeNP                                         | 1.05      | 441.34                                | abcr          | AB180833  |
| L106 |  | (R)-Xyl-P-Phos                             | 442905-33-1  | PP              | C <sub>46</sub> H <sub>50</sub> N <sub>2</sub> O <sub>4</sub> P <sub>2</sub> | 1.06      | 756.86                                | STREM         | 15-5210   |
| L107 |  | (S)-2-(Diphenylphosphinomethyl)pyrrolidine | 60261-46-3   | PN              | C <sub>17</sub> H <sub>20</sub> NP                                           | 1.06      | 269.33                                | Sigma-Aldrich | 716715    |

| #    | Structure                                                                           | Alias or name                                                                            | CAS#         | Type | Formula                                                       | Eq. to Rh | M <sub>w</sub> [g mol <sup>-1</sup> ] | Vendor        | Catalog # |
|------|-------------------------------------------------------------------------------------|------------------------------------------------------------------------------------------|--------------|------|---------------------------------------------------------------|-----------|---------------------------------------|---------------|-----------|
| L108 | 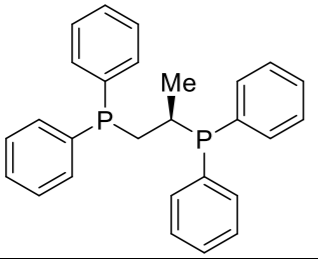   | ( <i>R</i> )-ProPhos                                                                     | 67884-32-6   | PP   | C <sub>27</sub> H <sub>26</sub> P <sub>2</sub>                | 1.06      | 412.45                                | STREM         | 15-0440   |
| L109 |    | (3 <i>R</i> )-3-(1,1-Dimethylethyl)-2,3-dihydro-4-(2-methoxyphenyl)-1,3-benzoxaphosphole | 1338454-28-6 | P    | C <sub>18</sub> H <sub>21</sub> O <sub>2</sub> P              | 2.04      | 300.34                                | STREM         | 15-6872   |
| L110 |    | (2 <i>S</i> ,3 <i>R</i> )-MeO-POP                                                        | 1215081-28-9 | PP   | C <sub>20</sub> H <sub>34</sub> O <sub>2</sub> P <sub>2</sub> | 1.04      | 368.44                                | STREM         | 15-6280   |
| L111 |    | ( <i>R,R</i> )-BenzP*                                                                    | 919778-41-9  | PP   | C <sub>16</sub> H <sub>26</sub> P <sub>2</sub>                | 1.08      | 282.35                                | STREM         | 15-0166   |
| L112 |   | SL-J216-1                                                                                | 849924-43-2  | PP   | C <sub>40</sub> H <sub>44</sub> FeP <sub>2</sub>              | 1.04      | 642.58                                | abcr          | AB426475  |
| L113 |  | ( <i>S,S</i> )-1-Naphthyl-DIPAMP                                                         | 256469-70-2  | PP   | C <sub>34</sub> H <sub>28</sub> P <sub>2</sub>                | 1.00      | 498.55                                | Sigma-Aldrich | 697788    |
| L114 |  | ( <i>S,R</i> )-PPFA                                                                      | 55650-58-3   | PN   | C <sub>26</sub> H <sub>28</sub> FeNP                          | 1.04      | 441.34                                | abcr          | AB180834  |
| L115 |  | SL-F173-1                                                                                | 166172-70-9  | PN   | C <sub>30</sub> H <sub>24</sub> F <sub>12</sub> FeNP          | 1.03      | 713.33                                | Sinocompound  | SC-4479   |

| #    | Structure | Alias or name              | CAS#         | Type   | Formula                                                                      | Eq. to Rh | M <sub>w</sub> [g mol <sup>-1</sup> ] | Vendor        | Catalog # |
|------|-----------|----------------------------|--------------|--------|------------------------------------------------------------------------------|-----------|---------------------------------------|---------------|-----------|
| L116 |           | ( <i>R</i> )-Xyl-SDP Oxide | 1462321-89-6 | P(P=O) | C <sub>49</sub> H <sub>50</sub> OP <sub>2</sub>                              | 1.04      | 716.89                                | Sigma-Aldrich | 798711    |
| L117 |           | ( <i>R</i> )-SITCP         | 856407-37-9  | P      | C <sub>25</sub> H <sub>23</sub> P                                            | 2.07      | 354.43                                | STREM         | 15-5184   |
| L118 |           | ( <i>R,R,R</i> )-Tol-SKP   | 1429939-32-1 | PP     | C <sub>48</sub> H <sub>46</sub> O <sub>2</sub> P <sub>2</sub>                | 1.01      | 716.84                                | STREM         | 15-4330   |
| L119 |           | ( <i>R,R</i> )-BCPM        | 114751-47-2  | PP     | C <sub>34</sub> H <sub>49</sub> NO <sub>2</sub> P <sub>2</sub>               | 1.06      | 565.72                                | STREM         | 15-7220   |
| L120 |           | ( <i>R</i> )-DiFluorPhos   | 503538-69-0  | PP     | C <sub>38</sub> H <sub>24</sub> F <sub>4</sub> O <sub>4</sub> P <sub>2</sub> | 1.04      | 682.55                                | STREM         | 15-0486   |
| L121 |           | ( <i>R,R</i> )-Me-BPE      | 129648-07-3  | PP     | C <sub>14</sub> H <sub>28</sub> P <sub>2</sub>                               | 1.10      | 258.33                                | STREM         | 15-0104   |

| #    | Structure                                                                           | Alias or name                                                                                                                                   | CAS#         | Type            | Formula                                                       | Eq. to Rh | M <sub>w</sub> [g mol <sup>-1</sup> ] | Vendor        | Catalog # |
|------|-------------------------------------------------------------------------------------|-------------------------------------------------------------------------------------------------------------------------------------------------|--------------|-----------------|---------------------------------------------------------------|-----------|---------------------------------------|---------------|-----------|
| L122 | 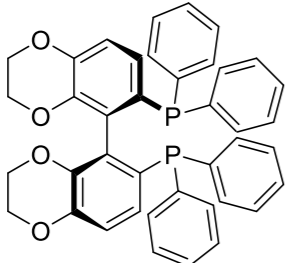   | ( <i>R</i> )-SynPhos                                                                                                                            | 445467-61-8  | PP              | C <sub>40</sub> H <sub>32</sub> O <sub>4</sub> P <sub>2</sub> | 1.06      | 638.64                                | STREM         | 15-0490   |
| L123 |    | ( <i>R</i> )-SIPhos                                                                                                                             | 443965-14-8  | Phosphoramidite | C <sub>19</sub> H <sub>20</sub> NO <sub>2</sub> P             | 2.03      | 325.35                                | STREM         | 15-5150   |
| L124 |    | (3 <i>R</i> ,8 <i>R</i> )-Tetrahydro- <i>N,N</i> ,2,2-tetramethyl-4,4,8,8-tetraphenyl-1,3-dioxolo[4,5- <i>e</i> ][1,3,2]dioxaphosphepin-6-amine | 213843-90-4  | Phosphoramidite | C <sub>33</sub> H <sub>34</sub> NO <sub>4</sub> P             | 2.07      | 539.61                                | Sigma-Aldrich | 665460    |
| L125 |   | ( <i>R</i> )-SDP                                                                                                                                | 917377-74-3  | PP              | C <sub>41</sub> H <sub>34</sub> P <sub>2</sub>                | 1.07      | 588.67                                | STREM         | 15-5174   |
| L126 |  | ( <i>R,R,R,R</i> )-Ph-BIBOP                                                                                                                     | 2301856-53-9 | PP              | C <sub>34</sub> H <sub>36</sub> O <sub>2</sub> P <sub>2</sub> | 1.04      | 538.61                                | STREM         | 15-6260   |
| L127 |  | ( <i>R,S</i> )-Ph-Bn-SIPHOS                                                                                                                     | 2074610-05-0 | PN              | C <sub>39</sub> H <sub>34</sub> NOP                           | 1.02      | 563.68                                | STREM         | 15-5186   |
| L128 |  | ( <i>R,R</i> )- <i>i</i> Pr-Ferrocene<br>(AKA ( <i>R,R</i> )- <i>i</i> Pr-BPF)                                                                  | 849950-54-5  | PP              | C <sub>30</sub> H <sub>48</sub> FeP <sub>2</sub>              | 1.02      | 526.51                                | STREM         | 26-1610   |

| #    | Structure                                                                           | Alias or name                                                                                 | CAS#         | Type            | Formula                                                       | Eq. to Rh | M <sub>w</sub> [g mol <sup>-1</sup> ] | Vendor | Catalog # |
|------|-------------------------------------------------------------------------------------|-----------------------------------------------------------------------------------------------|--------------|-----------------|---------------------------------------------------------------|-----------|---------------------------------------|--------|-----------|
| L129 | 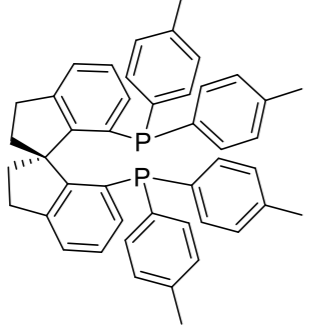   | (R)-Tol-SDP                                                                                   | 528521-87-1  | PP              | C <sub>45</sub> H <sub>42</sub> P <sub>2</sub>                | 1.09      | 644.78                                | STREM  | 15-5180   |
| L130 |    | (R)-DMM-GarPhos                                                                               | 1365531-93-6 | PP              | C <sub>52</sub> H <sub>60</sub> O <sub>8</sub> P <sub>2</sub> | 1.00      | 874.99                                | STREM  | 15-1666   |
| L131 |   | 8-[(3R)-3-(1,1-Dimethylethyl)-2,3-dihydro-1,3-benzoxaphosphol-4-yl]benzo[1,2-b:5,4-b']difuran | 1835717-07-1 | P               | C <sub>21</sub> H <sub>23</sub> O <sub>3</sub> P              | 2.03      | 354.39                                | STREM  | 15-6290   |
| L132 |  | (S)-PipPhos                                                                                   | 284472-79-3  | Phosphoramidite | C <sub>25</sub> H <sub>22</sub> NO <sub>2</sub> P             | 2.06      | 399.43                                | STREM  | 15-1234   |
| L133 |  | (R)-An-PhanePhos                                                                              | 364732-86-5  | PP              | C <sub>44</sub> H <sub>42</sub> O <sub>4</sub> P <sub>2</sub> | 1.01      | 696.76                                | STREM  | 15-0710   |
| L134 |  | (S)-BINAPINE                                                                                  | 528854-26-4  | PP              | C <sub>52</sub> H <sub>48</sub> P <sub>2</sub>                | 1.00      | 734.90                                | STREM  | 15-1053   |

| #    | Structure                                                                           | Alias or name                                                 | CAS#         | Type            | Formula                                                       | Eq. to Rh | M <sub>w</sub> [g mol <sup>-1</sup> ] | Vendor            | Catalog # |
|------|-------------------------------------------------------------------------------------|---------------------------------------------------------------|--------------|-----------------|---------------------------------------------------------------|-----------|---------------------------------------|-------------------|-----------|
| L135 | 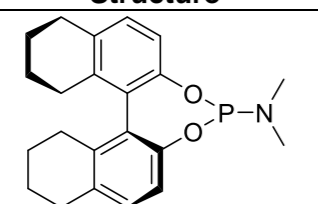   | (S)-H <sub>8</sub> -MonoPhos                                  | 389130-06-7  | Phosphoramidite | C <sub>22</sub> H <sub>26</sub> NO <sub>2</sub> P             | 2.07      | 367.43                                | Sigma-Aldrich     | 685569    |
| L136 |    | (R,R)-Me-Ferrocene                                            | 540475-45-4  | PP              | C <sub>22</sub> H <sub>32</sub> FeP <sub>2</sub>              | 1.03      | 414.29                                | Sigma-Aldrich     | 675601    |
| L137 |    | (R,R)-Et-Ferrocene                                            | 147762-89-8  | PP              | C <sub>26</sub> H <sub>40</sub> FeP <sub>2</sub>              | 1.05      | 470.40                                | Sigma-Aldrich     | 680990    |
| L138 |   | (S,S,S,S)-MeO-BIBOP                                           | 1202033-19-9 | PP              | C <sub>24</sub> H <sub>32</sub> O <sub>4</sub> P <sub>2</sub> | 1.03      | 446.46                                | STREM             | 15-6255   |
| L139 |  | (R)-CTH-BINAM                                                 | 208248-67-3  | PP              | C <sub>44</sub> H <sub>42</sub> N <sub>2</sub> P <sub>2</sub> | 1.07      | 660.78                                | Fisher Scientific | 11455420  |
| L140 |  | (2R)-1-[(R)-Aminophenylmethyl]-2-(diphenylphosphino)ferrocene | 498580-48-6  | PN              | C <sub>29</sub> H <sub>26</sub> FeNP                          | 1.09      | 475.35                                | STREM             | 26-1151   |
| L141 |  | (1R,2S)-TaniaPhos-OH                                          | 851308-43-5  | PP              | C <sub>41</sub> H <sub>34</sub> FeOP <sub>2</sub>             | 1.02      | 660.51                                | STREM             | 26-1160   |

| #    | Structure                                                                           | Alias or name                                                                     | CAS#         | Type            | Formula                                                                      | Eq. to Rh | M <sub>w</sub> [g mol <sup>-1</sup> ] | Vendor | Catalog # |
|------|-------------------------------------------------------------------------------------|-----------------------------------------------------------------------------------|--------------|-----------------|------------------------------------------------------------------------------|-----------|---------------------------------------|--------|-----------|
| L142 | 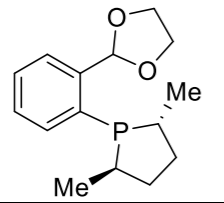   | 2-[2-[(2 <i>R</i> ,5 <i>R</i> )-2,5-Dimethyl-1-phospholanyl]phenyl]-1,3-dioxolane | 1044256-04-3 | P               | C <sub>15</sub> H <sub>21</sub> O <sub>2</sub> P                             | 2.09      | 264.30                                | STREM  | 15-7335   |
| L143 |    | ( <i>R,R</i> )-BPPM                                                               | 72598-03-9   | PP              | C <sub>34</sub> H <sub>37</sub> NO <sub>2</sub> P <sub>2</sub>               | 1.02      | 553.62                                | STREM  | 15-7216   |
| L144 |    | ( <i>S</i> )-MorfPhos                                                             | 185449-81-4  | Phosphoramidite | C <sub>24</sub> H <sub>20</sub> NO <sub>3</sub> P                            | 2.04      | 401.40                                | STREM  | 15-1235   |
| L145 |   | ( <i>R,R,R</i> )-Ph-SKP                                                           | 1360823-43-3 | PP              | C <sub>44</sub> H <sub>38</sub> O <sub>2</sub> P <sub>2</sub>                | 1.10      | 660.73                                | STREM  | 15-4310   |
| L146 |  | ( <i>S,R</i> )-N-PINAP                                                            | 1173836-08-2 | PN              | C <sub>38</sub> H <sub>30</sub> N <sub>3</sub> P                             | 1.08      | 559.65                                | STREM  | 15-1787   |
| L147 |  | ( <i>R</i> )-CTH-P-Phos                                                           | 221012-82-4  | PP              | C <sub>38</sub> H <sub>34</sub> N <sub>2</sub> O <sub>4</sub> P <sub>2</sub> | 1.10      | 644.65                                | STREM  | 15-5200   |

| #    | Structure                                                                           | Alias or name       | CAS#         | Type            | Formula                                                       | Eq. to Rh | M <sub>w</sub> [g mol <sup>-1</sup> ] | Vendor        | Catalog # |
|------|-------------------------------------------------------------------------------------|---------------------|--------------|-----------------|---------------------------------------------------------------|-----------|---------------------------------------|---------------|-----------|
| L148 | 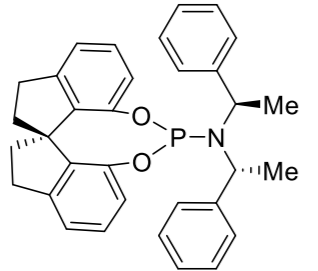   | (R)-SIPHOS-PE       | 500997-69-3  | Phosphoramidite | C <sub>33</sub> H <sub>32</sub> NO <sub>2</sub> P             | 2.00      | 505.60                                | Sigma-Aldrich | 700770    |
| L149 |    | (R)-Tol-GarPhos     | 1365531-81-2 | PP              | C <sub>44</sub> H <sub>44</sub> O <sub>4</sub> P <sub>2</sub> | 1.05      | 698.78                                | STREM         | 15-1657   |
| L150 |   | (R)-DTB-SpiroSAP-Ph | 1809609-38-8 | PNS             | C <sub>53</sub> H <sub>66</sub> NPS                           | 1.03      | 780.15                                | abcr          | AB470528  |
| L151 |  | SL-N004-1           | 1226898-27-6 | PN              | C <sub>29</sub> H <sub>30</sub> FeNOP                         | 1.03      | 495.38                                | Solvias       | NA        |
| L152 |  | SL-N011-2           | 950201-43-1  | PN              | C <sub>36</sub> H <sub>32</sub> FeNOP                         | 1.00      | 581.48                                | Solvias       | NA        |
| L153 |  | (S,S,S,S)-BIBOP     | 1202033-17-7 | PP              | C <sub>22</sub> H <sub>28</sub> O <sub>2</sub> P <sub>2</sub> | 1.05      | 386.41                                | STREM         | 15-6270   |
| L154 |  | SL-N009-2           | 706814-27-9  | PN              | C <sub>32</sub> H <sub>24</sub> F <sub>12</sub> FeNOP         | 1.01      | 753.35                                | Solvias       | NA        |



| #    | Structure                                                                           | Alias or name                                                        | CAS#         | Type | Formula                                                        | Eq. to Rh | M <sub>w</sub> [g mol <sup>-1</sup> ] | Vendor        | Catalog #  |
|------|-------------------------------------------------------------------------------------|----------------------------------------------------------------------|--------------|------|----------------------------------------------------------------|-----------|---------------------------------------|---------------|------------|
| L155 | 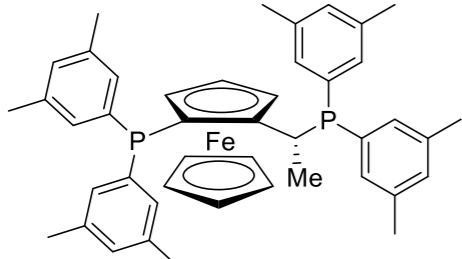   | SL-J408-1                                                            | 950982-69-1  | PP   | C <sub>44</sub> H <sub>48</sub> FeP <sub>2</sub>               | 1.03      | 694.66                                | BLDpharm      | BD01285898 |
| L156 |    | (2 <i>R</i> ,2 <i>R</i> )-2,2-bis(diphenylphosphino)-1,1-biferrocene | 136274-57-2  | PP   | C <sub>44</sub> H <sub>36</sub> Fe <sub>2</sub> P <sub>2</sub> | 1.07      | 738.41                                | TCI           | B3196      |
| L157 |    | ( <i>R</i> )-Cy-GarPhos                                              | 2829282-18-8 | PP   | C <sub>40</sub> H <sub>60</sub> O <sub>4</sub> P <sub>2</sub>  | 1.09      | 666.86                                | BLDpharm      | BD01593307 |
| L158 |   | ( <i>R</i> )-DTB-SpiroPAP-6-Me                                       | 1298133-26-2 | PNN  | C <sub>52</sub> H <sub>65</sub> N <sub>2</sub> P               | 1.05      | 749.08                                | abcr          | AB470532   |
| L159 |  | Exo-4-Methoxyphenyl Kwon [2.2.1] Bicyclic Phosphine                  | 1975180-37-0 | PN   | C <sub>19</sub> H <sub>22</sub> NO <sub>3</sub> PS             | 1.01      | 375.42                                | Sigma-Aldrich | 798746     |
| L160 |  | Endo-4-Methoxyphenyl Kwon [2.2.1] Bicyclic Phosphine                 | 1883493-01-3 | PN   | C <sub>19</sub> H <sub>22</sub> NO <sub>3</sub> PS             | 1.08      | 375.42                                | Sigma-Aldrich | 798444     |
| L161 |  | (1 <i>R</i> ,2 <i>R</i> )-(Diphenylphosphino)phenylbenzeneethanamine | 1091606-68-6 | PN   | C <sub>26</sub> H <sub>24</sub> NP                             | 1.08      | 381.46                                | STREM         | 15-7102    |

| #    | Structure | Alias or name                                                                                          | CAS#         | Type | Formula                                                        | Eq. to Rh | M <sub>w</sub> [g mol <sup>-1</sup> ] | Vendor        | Catalog # |
|------|-----------|--------------------------------------------------------------------------------------------------------|--------------|------|----------------------------------------------------------------|-----------|---------------------------------------|---------------|-----------|
| L162 |           | (1 <i>R</i> ,2 <i>R</i> )-2-(Diphenylphosphino)-2,3-dihydro-1H-inden-1-amine                           | 1091606-70-0 | PN   | C <sub>21</sub> H <sub>20</sub> NP                             | 1.02      | 317.37                                | STREM         | 15-7110   |
| L163 |           | ( <i>S,S</i> )-BuPh-SKEWPhos                                                                           | 911415-22-0  | PP   | C <sub>45</sub> H <sub>62</sub> P <sub>2</sub>                 | 1.07      | 664.94                                | Sinocompound  | SC-4481   |
| L164 |           | ( <i>R,R</i> )-( <i>S,S</i> )-Ph-TRAP                                                                  | 137096-37-8  | PP   | C <sub>48</sub> H <sub>44</sub> Fe <sub>2</sub> P <sub>2</sub> | 1.00      | 794.52                                | Sinocompound  | SC-4624   |
| L165 |           | ( <i>R</i> )-BINAPhane                                                                                 | 253311-88-5  | PP   | C <sub>50</sub> H <sub>36</sub> P <sub>2</sub>                 | 1.05      | 698.79                                | Sinocompound  | SC-4623   |
| L166 |           | (1 <i>R</i> )-8-(Diphenylphosphino)-1,2,3,4-tetrahydro-1-naphthalenamine                               | 960128-64-7  | PN   | C <sub>22</sub> H <sub>22</sub> NP                             | 1.09      | 331.40                                | Sigma-Aldrich | 716685    |
| L167 |           | ( <i>R,R</i> )- <i>i</i> Pr-DuPhos                                                                     | 136705-65-2  | PP   | C <sub>26</sub> H <sub>44</sub> P <sub>2</sub>                 | 1.06      | 418.59                                | STREM         | 15-0410   |
| L168 |           | (3 <i>R</i> )-4-[2,6-Bis(1-methylethoxy)phenyl]-3-(1,1-dimethylethyl)-2,3-dihydro-1,3-benzoxaphosphole | 1338454-38-8 | P    | C <sub>23</sub> H <sub>31</sub> O <sub>3</sub> P               | 2.04      | 386.47                                | STREM         | 15-6810   |

| #    | Structure | Alias or name                                                                            | CAS#         | Type   | Formula                                                         | Eq. to Rh | M <sub>w</sub> [g mol <sup>-1</sup> ] | Vendor       | Catalog # |
|------|-----------|------------------------------------------------------------------------------------------|--------------|--------|-----------------------------------------------------------------|-----------|---------------------------------------|--------------|-----------|
| L169 |           | SL-M002-1                                                                                | 494227-35-9  | PP     | C <sub>52</sub> H <sub>74</sub> FeN <sub>2</sub> P <sub>2</sub> | 1.06      | 844.97                                | STREM        | 26-0240   |
| L170 |           | (S)-DTBM-BINAP                                                                           | 541502-07-2  | PN     | C <sub>80</sub> H <sub>104</sub> O <sub>4</sub> P <sub>2</sub>  | 1.06      | 1191.66                               | Sinocompound | SC-4495   |
| L171 |           | (S,S,S,S)-Et-BABIBOP                                                                     | 2415751-83-4 | PP     | C <sub>26</sub> H <sub>36</sub> O <sub>2</sub> P <sub>2</sub>   | 1.03      | 442.52                                | abcr         | AB541715  |
| L172 |           | (R,R,R,R)-WingPhos                                                                       | 1884680-45-8 | PP     | C <sub>50</sub> H <sub>44</sub> O <sub>2</sub> P <sub>2</sub>   | 1.07      | 738.85                                | STREM        | 15-1970   |
| L173 |           | 2-[(2S,3S)-3-(1,1-Dimethylethyl)-2,3-dihydro-4-methoxy-1,3-benzoxaphosphol-2-yl]pyridine | 2565792-52-9 | PN     | C <sub>17</sub> H <sub>20</sub> NO <sub>2</sub> P               | 1.07      | 301.33                                | abcr         | AB549293  |
| L174 |           | SL-J681-1                                                                                | 1221745-90-9 | P(P=O) | C <sub>28</sub> H <sub>32</sub> FeOP <sub>2</sub>               | 1.07      | 502.36                                | STREM        | 26-1270   |

| #    | Structure                                                                           | Alias or name                | CAS#        | Type            | Formula                                                          | Eq. to Rh | M <sub>w</sub> [g mol <sup>-1</sup> ] | Vendor        | Catalog #  |
|------|-------------------------------------------------------------------------------------|------------------------------|-------------|-----------------|------------------------------------------------------------------|-----------|---------------------------------------|---------------|------------|
| L175 | 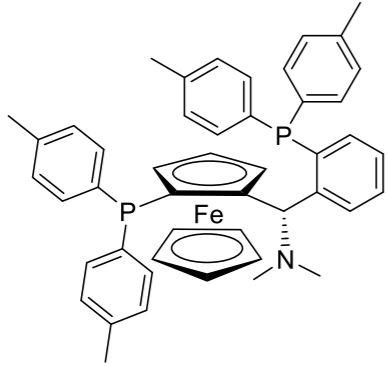   | (S,S)-Tol-TaniaPhos          | NA          | PP              | C <sub>47</sub> H <sub>47</sub> FeNP <sub>2</sub>                | 1.02      | 743.69                                | Sinocompound  | SC-4582    |
| L176 |    | (R,R)-2-Furyl-TaniaPhos      | NA          | PP              | C <sub>35</sub> H <sub>31</sub> FeNO <sub>4</sub> P <sub>2</sub> | 1.04      | 647.43                                | Sinocompound  | SC-4575    |
| L177 |    | (R)-DM-MorfPhos              | 864529-90-8 | Phosphoramidite | C <sub>27</sub> H <sub>26</sub> NO <sub>2</sub> P                | 2.00      | 427.48                                | Ambeed        | A1220020   |
| L178 |   | (R)-C <sub>2</sub> -TunePhos | 301847-88-1 | PP              | C <sub>38</sub> H <sub>30</sub> O <sub>2</sub> P <sub>2</sub>    | 1.04      | 580.60                                | Ambeed        | A976565    |
| L179 |  | (R)-QUINAP                   | 149341-34-4 | PN              | C <sub>31</sub> H <sub>22</sub> NP                               | 1.03      | 439.50                                | Sigma-Aldrich | 743461     |
| L180 |  | SL-J015-1                    | 649559-65-9 | PP              | C <sub>36</sub> H <sub>36</sub> FeO <sub>2</sub> P <sub>2</sub>  | 1.01      | 618.47                                | BLDpharm      | BD00958825 |

| #    | Structure | Alias or name                                                                                                             | CAS#         | Type | Formula                                                          | Eq. to Rh | M <sub>w</sub> [g mol <sup>-1</sup> ] | Vendor   | Catalog #  |
|------|-----------|---------------------------------------------------------------------------------------------------------------------------|--------------|------|------------------------------------------------------------------|-----------|---------------------------------------|----------|------------|
| L181 |           | SL-J403-1                                                                                                                 | 166172-60-7  | PP   | C <sub>40</sub> H <sub>28</sub> F <sub>12</sub> FeP <sub>2</sub> | 1.02      | 854.45                                | BLDpharm | BD01153829 |
| L182 |           | SL-J425-1                                                                                                                 | 849924-49-8  | PP   | C <sub>44</sub> H <sub>48</sub> FeO <sub>2</sub> P <sub>2</sub>  | 1.05      | 726.66                                | BLDpharm | BD633987   |
| L183 |           | ( <i>R,R</i> )-CyPP                                                                                                       | 70774-28-6   | PP   | C <sub>32</sub> H <sub>34</sub> P <sub>2</sub>                   | 1.07      | 480.57                                | Ambeed   | A458339    |
| L184 |           | ( <i>R,R</i> )-MeO-BoQPhos                                                                                                | 1542796-16-6 | PN   | C <sub>18</sub> H <sub>22</sub> NO <sub>3</sub> P                | 1.04      | 331.35                                | BLDpharm | BD01107463 |
| L185 |           | 2-[( <i>2R,3R</i> )-4-(2,6-Dimethoxyphenyl)-3-(1,1-dimethylethyl)-2,3-dihydro-1,3-benzoxaphosphol-2-yl]-6-methoxypyridine | 2565792-77-8 | P    | C <sub>25</sub> H <sub>28</sub> NO <sub>4</sub> P                | 2.07      | 437.48                                | BLDpharm | BD01151007 |
| L186 |           | 2-[( <i>2R,3R</i> )-4-(9-Anthracenyl)-3-(1,1-dimethylethyl)-2,3-dihydro-1,3-benzoxaphosphol-2-yl]pyridine                 | 1542796-14-4 | P    | C <sub>30</sub> H <sub>26</sub> NOP                              | 2.06      | 447.52                                | BLDpharm | BD01118981 |
| L187 |           | ( <i>S</i> )-SunPhos                                                                                                      | 765312-54-7  | PP   | C <sub>42</sub> H <sub>36</sub> O <sub>4</sub> P <sub>2</sub>    | 1.02      | 666.69                                | BLDpharm | BD01178671 |

| #    | Structure                                                                           | Alias or name                                                                                                                        | CAS#         | Type | Formula                                                         | Eq. to Rh | M <sub>w</sub> [g mol <sup>-1</sup> ] | Vendor   | Catalog #  |
|------|-------------------------------------------------------------------------------------|--------------------------------------------------------------------------------------------------------------------------------------|--------------|------|-----------------------------------------------------------------|-----------|---------------------------------------|----------|------------|
| L188 | 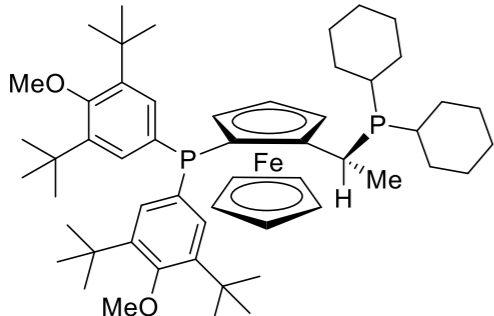   | (1 <i>R</i> )-1-[Bis[3,5-bis(1,1-dimethylethyl)-4-methoxyphenyl]phosphino]-2-[(1 <i>R</i> )-1-(dicyclohexylphosphino)ethyl]ferrocene | 1453803-83-2 | PP   | C <sub>54</sub> H <sub>80</sub> FeO <sub>2</sub> P <sub>2</sub> | 1.07      | 879.02                                | BLDpharm | BD01227140 |
| L189 |    | ((2 <i>R</i> ,5 <i>R</i> )-hexane-2,5-diy)bis(diphenylphosphane)                                                                     | 142494-67-5  | PP   | C <sub>30</sub> H <sub>32</sub> P <sub>2</sub>                  | 1.10      | 454.53                                | BLDpharm | BD01130209 |
| L190 |    | (2 <i>R</i> ,3 <i>R</i> )-4-(9-Anthracenyl)-3-(1,1-dimethylethyl)-2,3-dihydro-2-(1-methylethyl)-1,3-benzoxaphosphole                 | 1891002-60-0 | P    | C <sub>28</sub> H <sub>29</sub> OP                              | 2.04      | 412.51                                | STREM    | 15-6818    |
| L191 |   | ( <i>S,S</i> )-XantPhos                                                                                                              | 2119686-35-8 | PP   | C <sub>41</sub> H <sub>36</sub> O <sub>3</sub> P <sub>2</sub>   | 1.00      | 638.68                                | STREM    | 15-1239    |
| L192 |  | ( <i>R</i> )-3-( <i>tert</i> -Butyl)-4-(2,6-diphenoxyphenyl)-2,3-dihydrobenzo[d][1,3]oxaphosphole                                    | 1441830-74-5 | PP   | C <sub>29</sub> H <sub>27</sub> O <sub>3</sub> P                | 2.05      | 454.51                                | STREM    | 15-6814    |
