# Supplementary material for: Probing machine learning models based on high throughput experimentation data for the discovery of asymmetric hydrogenation catalysts
Source: Chem Sci. 2024 Jul 16. Online ahead of print. doi: 10.1039/d4sc03647f (PMC11352728; doi:10.1039/d4sc03647f)
Supplement: SC-OLF-D4SC03647F-s005 [file SC-OLF-D4SC03647F-s005.xlsx]

## Sheet: obj1
	target	ligand_descr	subs_descr	dataset	Case 1	Case 2	Case 3	Case 4	Case 5	Case 6	Case 7
0	Conversion	dft_nbd_model	dft_steric_fingerprint	test	0.745233	0.774951	0.733397	0.731486	0.751583	0.732685	0.588542
1	Conversion	dft_nbd_model	dft_steric_fingerprint	train	1	0.997573	0.925609	0.91693	0.98917	0.935695	0.918482
2	Conversion	dft_nbd_model	ecfp	test	0.745233	0.664153	0.754269	0.739024	0.693565	0.762334	0.578125
3	Conversion	dft_nbd_model	ecfp	train	0.994924	1	0.997817	0.979123	1	1	1
4	Conversion	dft_nbd_model	ohe	test	0.850998	0.786463	0.741461	0.73071	0.740705	0.716556	0.65625
5	Conversion	dft_nbd_model	ohe	train	0.986902	0.888486	0.97618	0.901604	0.984595	0.939266	0.869975
6	Conversion	dft_nbd_model	smiles_steric_fingerprint	test	0.745233	0.671463	0.737429	0.736142	0.744906	0.717979	0.635417
7	Conversion	dft_nbd_model	smiles_steric_fingerprint	train	1	0.982246	0.943922	0.917571	0.961953	1	0.915034
8	Conversion	ecfp	dft_steric_fingerprint	test	0.698337	0.717682	0.702562	0.737694	0.742086	0.717268	0.598958
9	Conversion	ecfp	dft_steric_fingerprint	train	0.879856	0.958111	0.934343	0.949302	0.930626	0.912063	0.930299
10	Conversion	ecfp	ecfp	test	0.642239	0.686716	0.725332	0.699667	0.726085	0.708491	0.614583
11	Conversion	ecfp	ecfp	train	0.827601	0.960156	0.930075	0.927907	0.957844	0.916349	0.919954
12	Conversion	ecfp	ohe	test	0.796341	0.727639	0.709203	0.721508	0.694313	0.676945	0.614583
13	Conversion	ecfp	ohe	train	0.97956	0.979819	0.922581	0.776726	0.784462	0.822414	0.854437
14	Conversion	ecfp	smiles_steric_fingerprint	test	0.705876	0.701968	0.7213	0.724058	0.727006	0.709203	0.630208
15	Conversion	ecfp	smiles_steric_fingerprint	train	0.887741	0.958111	0.952655	0.94847	0.934607	0.942928	0.913057
16	Conversion	ohe	dft_steric_fingerprint	test	0.5	0.657937	0.703748	0.5	0.5	0.634488	0.5
17	Conversion	ohe	dft_steric_fingerprint	train	0.632903	0.60996	0.864516	0.689116	0.695214	0.66242	0.5
18	Conversion	ohe	ecfp	test	0.5	0.5	0.646584	0.504545	0.596466	0.686195	0.5
19	Conversion	ohe	ecfp	train	0.632903	0.60996	0.751613	0.670667	0.675183	0.694268	0.5
20	Conversion	ohe	ohe	test	0.731707	0.672096	0.711812	0.69878	0.717509	0.712524	0.567708
21	Conversion	ohe	ohe	train	0.680488	0.678412	0.893548	0.848165	0.851355	0.832206	0.655172
22	Conversion	ohe	smiles_steric_fingerprint	test	0.5	0.542017	0.695683	0.5	0.587602	0.650617	0.5
23	Conversion	ohe	smiles_steric_fingerprint	train	0.632903	0.60996	0.851613	0.692757	0.692345	0.691083	0.5
24	Conversion	random	dft_steric_fingerprint	test	0.745233	0.692011	0.733397	0.730044	0.696788	0.758302	0.552083
25	Conversion	random	dft_steric_fingerprint	train	1	1	0.933202	0.978101	0.826541	1	1
26	Conversion	random	ecfp	test	0.711973	0.664153	0.750949	0.745233	0.720329	0.712524	0.614583
27	Conversion	random	ecfp	train	0.921958	1	0.993548	1	0.994779	0.831968	1
28	Conversion	random	ohe	test	0.748115	0.7818	0.728653	0.704767	0.708012	0.717268	0.59375
29	Conversion	random	ohe	train	0.930888	1	0.906254	0.808907	0.828118	0.89407	1
30	Conversion	random	smiles_steric_fingerprint	test	0.745233	0.664153	0.720588	0.745233	0.73138	0.722011	0.609375
31	Conversion	random	smiles_steric_fingerprint	train	1	1	0.905212	1	0.992039	0.998408	1
32	Conversion	random_35	dft_steric_fingerprint	test	0.702882	0.825371	0.741461	0.745233	0.664729	0.717979	0.578125
33	Conversion	random_35	dft_steric_fingerprint	train	0.853661	1	0.983871	1	0.997389	0.926766	1
34	Conversion	random_35	ecfp	test	0.740687	0.664153	0.745493	0.740687	0.689363	0.754981	0.614583
35	Conversion	random_35	ecfp	train	0.997326	1	0.993548	1	1	1	0.970322
36	Conversion	random_35	ohe	test	0.793348	0.736675	0.723435	0.692683	0.733855	0.70185	0.598958
37	Conversion	random_35	ohe	train	1	0.997191	1	0.882704	0.939311	0.906809	0.87439
38	Conversion	random_35	smiles_steric_fingerprint	test	0.702993	0.652181	0.707306	0.745233	0.722977	0.734108	0.671875
39	Conversion	random_35	smiles_steric_fingerprint	train	0.835487	0.898358	0.980645	1	1	1	1
40	DDG	dft_nbd_model	dft_steric_fingerprint	test	0.592192	0.622412	0.70152	0.648019	0.46591	0.706582	-0.861992
41	DDG	dft_nbd_model	dft_steric_fingerprint	train	0.955847	0.921707	0.911822	0.94816	0.903527	0.904804	0.669648
42	DDG	dft_nbd_model	ecfp	test	0.598554	0.627136	0.702125	0.593039	0.479512	0.689947	-1.14237
43	DDG	dft_nbd_model	ecfp	train	0.932024	0.929494	0.949437	0.945732	0.902203	0.90606	0.893206
44	DDG	dft_nbd_model	ohe	test	0.548916	0.623989	0.681063	0.573071	0.433443	0.530802	-0.325061
45	DDG	dft_nbd_model	ohe	train	0.901005	0.923684	0.876115	0.553743	0.550889	0.542153	0.329852
46	DDG	dft_nbd_model	smiles_steric_fingerprint	test	0.601775	0.630032	0.693698	0.64787	0.366986	0.690723	-0.59607
47	DDG	dft_nbd_model	smiles_steric_fingerprint	train	0.932125	0.933694	0.945879	0.915389	0.915642	0.94178	0.668442
48	DDG	ecfp	dft_steric_fingerprint	test	0.594427	0.492918	0.609059	0.49068	0.339652	0.542371	-0.455282
49	DDG	ecfp	dft_steric_fingerprint	train	0.73323	0.794644	0.741035	0.597976	0.733909	0.665684	0.451378
50	DDG	ecfp	ecfp	test	0.519348	0.416433	0.523123	0.369391	0.250603	0.409514	-0.400298
51	DDG	ecfp	ecfp	train	0.637143	0.695902	0.623323	0.516986	0.58706	0.511894	0.483734
52	DDG	ecfp	ohe	test	0.623898	0.467694	0.664812	0.509587	0.384533	0.226085	-0.358167
53	DDG	ecfp	ohe	train	0.836279	0.732607	0.802595	0.453019	0.458389	0.253979	0.348145
54	DDG	ecfp	smiles_steric_fingerprint	test	0.519339	0.374834	0.567691	0.418933	0.23946	0.442853	-0.41503
55	DDG	ecfp	smiles_steric_fingerprint	train	0.639353	0.644356	0.70414	0.493793	0.628525	0.539596	0.448623
56	DDG	ohe	dft_steric_fingerprint	test	0.264413	0.172627	0.471851	0.174504	0.153056	0.412183	-0.016529
57	DDG	ohe	dft_steric_fingerprint	train	0.305203	0.290617	0.519262	0.283137	0.293483	0.447462	0.000252007
58	DDG	ohe	ecfp	test	0.167477	0.131615	0.421444	0.110637	0.0618844	0.263428	-0.0168502
59	DDG	ohe	ecfp	train	0.219063	0.231578	0.462658	0.201498	0.174328	0.300794	0.000291836
60	DDG	ohe	ohe	test	0.586626	0.369497	0.685184	0.486246	0.340354	0.496062	-1.06047
61	DDG	ohe	ohe	train	0.699266	0.58419	0.782769	0.40693	0.376694	0.437336	0.502985
62	DDG	ohe	smiles_steric_fingerprint	test	0.177762	0.0792776	0.42835	0.129902	0.0711182	0.336792	-0.0156875
63	DDG	ohe	smiles_steric_fingerprint	train	0.220129	0.141663	0.47376	0.289948	0.209705	0.431173	0.000252007
64	DDG	random	dft_steric_fingerprint	test	0.55775	0.630196	0.690272	0.644517	0.458387	0.673538	-0.284853
65	DDG	random	dft_steric_fingerprint	train	0.916748	0.929527	0.923588	0.841396	0.90198	0.831426	0.354904
66	DDG	random	ecfp	test	0.583764	0.627965	0.688588	0.586923	0.487874	0.684422	-0.228671
67	DDG	random	ecfp	train	0.944792	0.919705	0.907778	0.917937	0.858567	0.896204	0.341676
68	DDG	random	ohe	test	0.548851	0.627283	0.681673	0.546696	0.368321	0.467835	-0.269632
69	DDG	random	ohe	train	0.881334	0.903327	0.854072	0.453913	0.435274	0.427005	0.317464
70	DDG	random	smiles_steric_fingerprint	test	0.569091	0.627695	0.685669	0.646662	0.400421	0.661344	-0.243238
71	DDG	random	smiles_steric_fingerprint	train	0.929074	0.922976	0.894041	0.92051	0.925391	0.837019	0.345792
72	DDG	random_35	dft_steric_fingerprint	test	0.578556	0.631206	0.695773	0.625776	0.453295	0.70626	-0.2489
73	DDG	random_35	dft_steric_fingerprint	train	0.918698	0.952981	0.939459	0.942789	0.893826	0.933625	0.331024
74	DDG	random_35	ecfp	test	0.597078	0.629129	0.699347	0.566981	0.480946	0.672882	-0.170575
75	DDG	random_35	ecfp	train	0.926573	0.958778	0.91344	0.93829	0.903099	0.888831	0.306071
76	DDG	random_35	ohe	test	0.530622	0.628145	0.676836	0.546684	0.358485	0.491112	-0.227212
77	DDG	random_35	ohe	train	0.902544	0.936671	0.879699	0.544468	0.461657	0.486042	0.292458
78	DDG	random_35	smiles_steric_fingerprint	test	0.595736	0.624771	0.699934	0.638514	0.444195	0.678617	-0.216052
79	DDG	random_35	smiles_steric_fingerprint	train	0.956587	0.939978	0.946503	0.948392	0.946692	0.936451	0.3301

## Sheet: obj2
	target	ligand_descr	subs_descr	dataset	Case 1	Case 2	Case 3	Case 4	Case 5	Case 6	Case 7
0	Conversion	dft_nbd_model	dft_steric_fingerprint	test	[0.83, 0.86, 0.79]	[0.76, 0.85, 0.78]	[0.72, 0.67, 0.76]	[0.77, 0.81, 0.65]	[0.72, 0.72, 0.68]	[0.74, 0.73, 0.82]	[0.73, 0.61, 0.71]
1	Conversion	dft_nbd_model	dft_steric_fingerprint	train	[1.0, 1.0, 1.0]	[0.97, 1.0, 0.96]	[1.0, 1.0, 1.0]	[0.97, 0.96, 0.95]	[0.96, 0.95, 1.0]	[0.95, 0.94, 0.94]	[0.92, 0.93, 0.95]
2	Conversion	dft_nbd_model	ecfp	test	[0.85, 0.82, 0.78]	[0.72, 0.86, 0.74]	[0.7, 0.68, 0.8]	[0.81, 0.79, 0.67]	[0.68, 0.76, 0.7]	[0.65, 0.69, 0.85]	[0.78, 0.68, 0.67]
3	Conversion	dft_nbd_model	ecfp	train	[0.99, 0.98, 1.0]	[1.0, 1.0, 1.0]	[1.0, 1.0, 1.0]	[0.97, 1.0, 1.0]	[0.96, 1.0, 0.97]	[1.0, 1.0, 0.96]	[1.0, 0.96, 1.0]
4	Conversion	dft_nbd_model	ohe	test	[0.83, 0.84, 0.78]	[0.77, 0.83, 0.78]	[0.7, 0.74, 0.75]	[0.72, 0.76, 0.67]	[0.77, 0.74, 0.72]	[0.68, 0.74, 0.76]	[0.67, 0.55, 0.62]
5	Conversion	dft_nbd_model	ohe	train	[1.0, 0.95, 0.99]	[0.96, 0.96, 0.93]	[0.91, 0.89, 0.88]	[0.96, 0.97, 0.96]	[0.86, 0.97, 0.91]	[0.91, 0.89, 0.87]	[0.88, 0.75, 0.77]
6	Conversion	dft_nbd_model	smiles_steric_fingerprint	test	[0.82, 0.83, 0.8]	[0.8, 0.84, 0.78]	[0.65, 0.62, 0.75]	[0.78, 0.82, 0.66]	[0.77, 0.75, 0.69]	[0.67, 0.68, 0.72]	[0.72, 0.71, 0.71]
7	Conversion	dft_nbd_model	smiles_steric_fingerprint	train	[1.0, 1.0, 1.0]	[0.98, 0.98, 0.98]	[1.0, 1.0, 1.0]	[1.0, 1.0, 0.96]	[0.94, 0.94, 0.93]	[0.92, 1.0, 0.95]	[0.92, 1.0, 0.94]
8	Conversion	ecfp	dft_steric_fingerprint	test	[0.78, 0.8, 0.76]	[0.74, 0.83, 0.78]	[0.72, 0.75, 0.74]	[0.7, 0.76, 0.72]	[0.73, 0.67, 0.67]	[0.7, 0.73, 0.75]	[0.63, 0.67, 0.6]
9	Conversion	ecfp	dft_steric_fingerprint	train	[0.93, 0.93, 0.92]	[0.97, 0.92, 0.96]	[0.96, 0.97, 0.95]	[0.94, 0.92, 0.95]	[0.92, 0.93, 0.92]	[0.95, 0.93, 0.92]	[0.93, 0.91, 0.93]
10	Conversion	ecfp	ecfp	test	[0.77, 0.83, 0.81]	[0.64, 0.8, 0.73]	[0.75, 0.76, 0.74]	[0.72, 0.77, 0.74]	[0.67, 0.7, 0.69]	[0.72, 0.77, 0.79]	[0.69, 0.61, 0.61]
11	Conversion	ecfp	ecfp	train	[0.97, 0.95, 0.96]	[0.96, 0.97, 0.93]	[0.95, 0.95, 0.95]	[0.95, 0.94, 0.91]	[0.95, 0.92, 0.95]	[0.93, 0.93, 0.92]	[0.94, 0.92, 0.93]
12	Conversion	ecfp	ohe	test	[0.82, 0.85, 0.76]	[0.76, 0.79, 0.78]	[0.7, 0.7, 0.7]	[0.74, 0.75, 0.68]	[0.76, 0.72, 0.68]	[0.66, 0.68, 0.66]	[0.6, 0.61, 0.58]
13	Conversion	ecfp	ohe	train	[0.9, 0.9, 0.86]	[0.92, 0.88, 0.88]	[0.89, 0.89, 0.88]	[0.83, 0.78, 0.78]	[0.79, 0.77, 0.8]	[0.77, 0.81, 0.75]	[0.83, 0.82, 0.76]
14	Conversion	ecfp	smiles_steric_fingerprint	test	[0.75, 0.79, 0.77]	[0.69, 0.78, 0.72]	[0.74, 0.64, 0.75]	[0.71, 0.75, 0.67]	[0.75, 0.72, 0.68]	[0.72, 0.7, 0.77]	[0.65, 0.63, 0.59]
15	Conversion	ecfp	smiles_steric_fingerprint	train	[0.92, 0.9, 0.94]	[0.95, 0.96, 0.92]	[0.96, 0.96, 0.96]	[0.93, 0.92, 0.95]	[0.96, 0.93, 0.95]	[0.96, 0.96, 0.93]	[0.93, 0.92, 0.93]
16	Conversion	ohe	dft_steric_fingerprint	test	[0.6, 0.5, 0.51]	[0.5, 0.5, 0.5]	[0.5, 0.5, 0.5]	[0.65, 0.59, 0.59]	[0.5, 0.5, 0.5]	[0.5, 0.5, 0.52]	[0.5, 0.51, 0.52]
17	Conversion	ohe	dft_steric_fingerprint	train	[0.66, 0.67, 0.65]	[0.61, 0.61, 0.61]	[0.73, 0.7, 0.71]	[0.69, 0.68, 0.68]	[0.67, 0.67, 0.66]	[0.69, 0.68, 0.67]	[0.56, 0.52, 0.61]
18	Conversion	ohe	ecfp	test	[0.55, 0.5, 0.5]	[0.5, 0.5, 0.5]	[0.5, 0.5, 0.5]	[0.72, 0.54, 0.5]	[0.5, 0.5, 0.5]	[0.5, 0.5, 0.5]	[0.5, 0.5, 0.56]
19	Conversion	ohe	ecfp	train	[0.66, 0.62, 0.63]	[0.61, 0.61, 0.61]	[0.67, 0.61, 0.6]	[0.7, 0.68, 0.66]	[0.65, 0.65, 0.65]	[0.64, 0.64, 0.63]	[0.56, 0.55, 0.56]
20	Conversion	ohe	ohe	test	[0.8, 0.81, 0.66]	[0.62, 0.61, 0.79]	[0.51, 0.54, 0.54]	[0.68, 0.71, 0.63]	[0.68, 0.67, 0.71]	[0.57, 0.64, 0.64]	[0.54, 0.58, 0.59]
21	Conversion	ohe	ohe	train	[0.87, 0.87, 0.86]	[0.85, 0.86, 0.9]	[0.92, 0.91, 0.91]	[0.8, 0.82, 0.85]	[0.83, 0.83, 0.82]	[0.82, 0.83, 0.83]	[0.76, 0.71, 0.75]
22	Conversion	ohe	smiles_steric_fingerprint	test	[0.5, 0.5, 0.5]	[0.5, 0.5, 0.5]	[0.5, 0.5, 0.5]	[0.58, 0.5, 0.5]	[0.5, 0.5, 0.5]	[0.5, 0.5, 0.5]	[0.5, 0.5, 0.52]
23	Conversion	ohe	smiles_steric_fingerprint	train	[0.64, 0.63, 0.63]	[0.62, 0.62, 0.62]	[0.73, 0.72, 0.71]	[0.69, 0.67, 0.67]	[0.66, 0.67, 0.66]	[0.7, 0.7, 0.67]	[0.56, 0.57, 0.61]
24	Conversion	random	dft_steric_fingerprint	test	[0.73, 0.81, 0.71]	[0.78, 0.86, 0.78]	[0.66, 0.71, 0.7]	[0.73, 0.68, 0.65]	[0.73, 0.67, 0.6]	[0.62, 0.73, 0.67]	[0.59, 0.56, 0.56]
25	Conversion	random	dft_steric_fingerprint	train	[1.0, 1.0, 1.0]	[0.99, 0.99, 0.97]	[0.98, 0.98, 0.9]	[0.96, 0.83, 0.91]	[0.95, 0.94, 0.95]	[0.8, 0.8, 0.78]	[0.99, 0.88, 0.78]
26	Conversion	random	ecfp	test	[0.73, 0.73, 0.74]	[0.78, 0.84, 0.82]	[0.68, 0.72, 0.73]	[0.72, 0.71, 0.61]	[0.73, 0.69, 0.7]	[0.63, 0.72, 0.66]	[0.58, 0.54, 0.52]
27	Conversion	random	ecfp	train	[1.0, 1.0, 1.0]	[0.98, 0.98, 1.0]	[1.0, 0.99, 0.97]	[0.98, 0.95, 0.94]	[0.94, 0.96, 0.95]	[0.81, 0.87, 0.76]	[1.0, 0.9, 1.0]
28	Conversion	random	ohe	test	[0.75, 0.82, 0.82]	[0.77, 0.85, 0.81]	[0.65, 0.72, 0.72]	[0.75, 0.72, 0.62]	[0.71, 0.74, 0.72]	[0.66, 0.72, 0.65]	[0.58, 0.59, 0.57]
29	Conversion	random	ohe	train	[0.93, 0.93, 0.92]	[0.96, 0.94, 0.96]	[0.88, 0.89, 0.91]	[0.82, 0.8, 0.81]	[0.81, 0.83, 0.81]	[0.75, 0.84, 0.75]	[0.8, 0.89, 0.85]
30	Conversion	random	smiles_steric_fingerprint	test	[0.78, 0.83, 0.8]	[0.78, 0.85, 0.81]	[0.59, 0.71, 0.73]	[0.73, 0.74, 0.63]	[0.75, 0.71, 0.68]	[0.64, 0.72, 0.67]	[0.6, 0.57, 0.52]
31	Conversion	random	smiles_steric_fingerprint	train	[1.0, 1.0, 1.0]	[1.0, 1.0, 1.0]	[0.99, 1.0, 0.98]	[0.98, 0.97, 0.94]	[0.99, 1.0, 0.98]	[0.89, 0.88, 0.77]	[0.98, 0.89, 0.98]
32	Conversion	random_35	dft_steric_fingerprint	test	[0.77, 0.77, 0.8]	[0.79, 0.83, 0.81]	[0.64, 0.7, 0.74]	[0.62, 0.65, 0.57]	[0.67, 0.58, 0.64]	[0.63, 0.68, 0.73]	[0.55, 0.55, 0.53]
33	Conversion	random_35	dft_steric_fingerprint	train	[1.0, 1.0, 1.0]	[1.0, 1.0, 1.0]	[1.0, 1.0, 0.99]	[0.96, 0.98, 1.0]	[1.0, 1.0, 0.95]	[0.93, 0.76, 0.97]	[1.0, 0.98, 1.0]
34	Conversion	random_35	ecfp	test	[0.72, 0.67, 0.69]	[0.8, 0.84, 0.81]	[0.66, 0.7, 0.74]	[0.68, 0.68, 0.62]	[0.62, 0.66, 0.63]	[0.58, 0.64, 0.73]	[0.52, 0.52, 0.53]
35	Conversion	random_35	ecfp	train	[1.0, 1.0, 1.0]	[1.0, 1.0, 1.0]	[1.0, 1.0, 1.0]	[1.0, 1.0, 1.0]	[1.0, 1.0, 1.0]	[0.97, 1.0, 1.0]	[1.0, 0.9, 1.0]
36	Conversion	random_35	ohe	test	[0.79, 0.79, 0.8]	[0.78, 0.85, 0.81]	[0.68, 0.72, 0.73]	[0.73, 0.69, 0.63]	[0.76, 0.73, 0.71]	[0.69, 0.72, 0.68]	[0.6, 0.58, 0.54]
37	Conversion	random_35	ohe	train	[0.99, 0.99, 0.99]	[0.97, 1.0, 0.97]	[0.98, 0.92, 0.96]	[0.91, 0.83, 0.95]	[0.88, 0.89, 0.89]	[0.82, 0.87, 0.77]	[0.92, 0.77, 0.87]
38	Conversion	random_35	smiles_steric_fingerprint	test	[0.79, 0.83, 0.79]	[0.78, 0.85, 0.81]	[0.56, 0.55, 0.7]	[0.68, 0.72, 0.65]	[0.74, 0.69, 0.69]	[0.55, 0.68, 0.71]	[0.54, 0.55, 0.54]
39	Conversion	random_35	smiles_steric_fingerprint	train	[1.0, 1.0, 1.0]	[1.0, 1.0, 1.0]	[1.0, 1.0, 0.99]	[0.99, 0.99, 0.98]	[1.0, 1.0, 0.99]	[0.96, 1.0, 1.0]	[1.0, 0.91, 0.96]
40	DDG	dft_nbd_model	dft_steric_fingerprint	test	[0.63, 0.63, 0.7]	[0.62, 0.68, 0.64]	[0.83, 0.74, 0.78]	[0.68, 0.71, 0.73]	[0.6, 0.64, 0.6]	[0.84, 0.74, 0.79]	[-0.11, -0.41, -0.54]
41	DDG	dft_nbd_model	dft_steric_fingerprint	train	[0.93, 0.94, 0.92]	[0.93, 0.92, 0.93]	[0.93, 0.94, 0.92]	[0.92, 0.92, 0.94]	[0.93, 0.93, 0.91]	[0.93, 0.92, 0.94]	[0.34, 0.69, 0.77]
42	DDG	dft_nbd_model	ecfp	test	[0.67, 0.69, 0.72]	[0.64, 0.67, 0.64]	[0.82, 0.75, 0.78]	[0.6, 0.66, 0.66]	[0.53, 0.56, 0.54]	[0.79, 0.72, 0.73]	[-0.09, -0.37, -0.35]
43	DDG	dft_nbd_model	ecfp	train	[0.93, 0.95, 0.94]	[0.94, 0.94, 0.94]	[0.93, 0.95, 0.93]	[0.92, 0.93, 0.94]	[0.93, 0.93, 0.93]	[0.93, 0.93, 0.93]	[0.37, 0.78, 0.78]
44	DDG	dft_nbd_model	ohe	test	[0.58, 0.59, 0.65]	[0.63, 0.67, 0.63]	[0.77, 0.73, 0.74]	[0.53, 0.61, 0.58]	[0.44, 0.52, 0.44]	[0.56, 0.52, 0.61]	[-0.28, -0.28, -0.36]
45	DDG	dft_nbd_model	ohe	train	[0.89, 0.89, 0.89]	[0.88, 0.87, 0.88]	[0.88, 0.88, 0.88]	[0.52, 0.55, 0.52]	[0.55, 0.73, 0.52]	[0.48, 0.52, 0.55]	[0.28, 0.3, 0.3]
46	DDG	dft_nbd_model	smiles_steric_fingerprint	test	[0.64, 0.66, 0.7]	[0.65, 0.65, 0.64]	[0.82, 0.74, 0.78]	[0.67, 0.72, 0.73]	[0.58, 0.63, 0.58]	[0.82, 0.73, 0.75]	[-0.11, -0.38, -0.45]
47	DDG	dft_nbd_model	smiles_steric_fingerprint	train	[0.94, 0.94, 0.94]	[0.94, 0.95, 0.94]	[0.93, 0.95, 0.95]	[0.95, 0.95, 0.92]	[0.92, 0.95, 0.94]	[0.94, 0.95, 0.95]	[0.33, 0.69, 0.77]
48	DDG	ecfp	dft_steric_fingerprint	test	[0.59, 0.63, 0.6]	[0.44, 0.4, 0.38]	[0.68, 0.59, 0.53]	[0.5, 0.53, 0.52]	[0.29, 0.28, 0.27]	[0.59, 0.44, 0.5]	[-0.03, -0.04, -0.12]
49	DDG	ecfp	dft_steric_fingerprint	train	[0.76, 0.74, 0.74]	[0.76, 0.76, 0.76]	[0.73, 0.72, 0.74]	[0.64, 0.62, 0.63]	[0.65, 0.71, 0.71]	[0.66, 0.6, 0.62]	[0.1, 0.11, 0.26]
50	DDG	ecfp	ecfp	test	[0.5, 0.51, 0.49]	[0.33, 0.25, 0.27]	[0.63, 0.54, 0.45]	[0.38, 0.39, 0.38]	[0.19, 0.18, 0.17]	[0.5, 0.42, 0.34]	[-0.01, -0.06, -0.19]
51	DDG	ecfp	ecfp	train	[0.69, 0.69, 0.65]	[0.73, 0.71, 0.71]	[0.68, 0.7, 0.67]	[0.6, 0.59, 0.61]	[0.56, 0.62, 0.57]	[0.58, 0.57, 0.57]	[0.11, 0.13, 0.31]
52	DDG	ecfp	ohe	test	[0.61, 0.67, 0.65]	[0.52, 0.55, 0.52]	[0.78, 0.68, 0.71]	[0.48, 0.52, 0.51]	[0.36, 0.38, 0.38]	[0.53, 0.43, 0.49]	[-0.02, -0.07, -0.08]
53	DDG	ecfp	ohe	train	[0.77, 0.78, 0.77]	[0.79, 0.79, 0.78]	[0.77, 0.78, 0.79]	[0.47, 0.46, 0.46]	[0.46, 0.48, 0.47]	[0.45, 0.45, 0.46]	[0.09, 0.13, 0.14]
54	DDG	ecfp	smiles_steric_fingerprint	test	[0.5, 0.47, 0.51]	[0.36, 0.35, 0.29]	[0.61, 0.58, 0.41]	[0.43, 0.36, 0.42]	[0.27, 0.2, 0.23]	[0.5, 0.41, 0.37]	[-0.03, -0.11, -0.13]
55	DDG	ecfp	smiles_steric_fingerprint	train	[0.71, 0.68, 0.69]	[0.7, 0.73, 0.68]	[0.69, 0.71, 0.71]	[0.68, 0.56, 0.58]	[0.69, 0.68, 0.57]	[0.66, 0.63, 0.68]	[0.1, 0.26, 0.26]
56	DDG	ohe	dft_steric_fingerprint	test	[0.26, 0.23, 0.29]	[0.16, 0.16, 0.21]	[0.43, 0.44, 0.31]	[0.18, 0.18, 0.24]	[0.1, 0.08, 0.14]	[0.31, 0.35, 0.23]	[-0.02, -0.01, -0.0]
57	DDG	ohe	dft_steric_fingerprint	train	[0.38, 0.36, 0.38]	[0.41, 0.36, 0.4]	[0.53, 0.61, 0.5]	[0.35, 0.34, 0.36]	[0.33, 0.29, 0.35]	[0.44, 0.5, 0.42]	[0.0, 0.0, 0.0]
58	DDG	ohe	ecfp	test	[0.2, 0.2, 0.23]	[0.11, 0.11, 0.13]	[0.34, 0.35, 0.24]	[0.1, 0.09, 0.13]	[0.05, 0.03, 0.06]	[0.17, 0.19, 0.09]	[-0.02, -0.01, -0.0]
59	DDG	ohe	ecfp	train	[0.33, 0.31, 0.29]	[0.28, 0.29, 0.29]	[0.39, 0.47, 0.35]	[0.23, 0.25, 0.23]	[0.22, 0.2, 0.21]	[0.29, 0.33, 0.28]	[0.0, 0.0, 0.0]
60	DDG	ohe	ohe	test	[0.52, 0.51, 0.6]	[0.36, 0.4, 0.37]	[0.67, 0.62, 0.62]	[0.34, 0.38, 0.43]	[0.26, 0.28, 0.28]	[0.34, 0.39, 0.35]	[-0.02, -0.01, -0.0]
61	DDG	ohe	ohe	train	[0.7, 0.68, 0.71]	[0.64, 0.63, 0.63]	[0.74, 0.75, 0.73]	[0.41, 0.4, 0.42]	[0.4, 0.4, 0.41]	[0.42, 0.46, 0.44]	[0.0, 0.0, 0.0]
62	DDG	ohe	smiles_steric_fingerprint	test	[0.16, 0.15, 0.22]	[0.09, 0.1, 0.1]	[0.25, 0.27, 0.18]	[0.14, 0.08, 0.23]	[0.07, 0.05, 0.07]	[0.17, 0.22, 0.13]	[-0.02, -0.01, -0.0]
63	DDG	ohe	smiles_steric_fingerprint	train	[0.3, 0.3, 0.34]	[0.24, 0.24, 0.25]	[0.39, 0.43, 0.38]	[0.33, 0.3, 0.36]	[0.28, 0.27, 0.3]	[0.39, 0.45, 0.34]	[0.0, 0.0, 0.0]
64	DDG	random	dft_steric_fingerprint	test	[0.61, 0.6, 0.67]	[0.63, 0.66, 0.64]	[0.8, 0.74, 0.76]	[0.66, 0.68, 0.71]	[0.55, 0.58, 0.56]	[0.81, 0.71, 0.76]	[-0.14, -0.2, -0.2]
65	DDG	random	dft_steric_fingerprint	train	[0.91, 0.89, 0.9]	[0.88, 0.9, 0.91]	[0.9, 0.91, 0.91]	[0.9, 0.89, 0.85]	[0.89, 0.86, 0.86]	[0.89, 0.86, 0.85]	[0.3, 0.29, 0.3]
66	DDG	random	ecfp	test	[0.62, 0.62, 0.69]	[0.63, 0.66, 0.64]	[0.8, 0.74, 0.77]	[0.59, 0.65, 0.61]	[0.57, 0.56, 0.56]	[0.78, 0.7, 0.73]	[-0.13, -0.17, -0.18]
67	DDG	random	ecfp	train	[0.91, 0.92, 0.92]	[0.9, 0.91, 0.92]	[0.92, 0.91, 0.92]	[0.9, 0.9, 0.9]	[0.88, 0.85, 0.88]	[0.89, 0.89, 0.89]	[0.28, 0.29, 0.28]
68	DDG	random	ohe	test	[0.56, 0.57, 0.63]	[0.63, 0.66, 0.64]	[0.76, 0.72, 0.72]	[0.47, 0.57, 0.51]	[0.41, 0.45, 0.43]	[0.55, 0.44, 0.49]	[-0.23, -0.21, -0.24]
69	DDG	random	ohe	train	[0.86, 0.86, 0.86]	[0.87, 0.85, 0.87]	[0.84, 0.85, 0.85]	[0.46, 0.48, 0.46]	[0.49, 0.49, 0.48]	[0.46, 0.46, 0.46]	[0.26, 0.26, 0.25]
70	DDG	random	smiles_steric_fingerprint	test	[0.62, 0.62, 0.68]	[0.63, 0.67, 0.64]	[0.79, 0.74, 0.76]	[0.66, 0.69, 0.71]	[0.53, 0.56, 0.56]	[0.79, 0.71, 0.76]	[-0.14, -0.2, -0.21]
71	DDG	random	smiles_steric_fingerprint	train	[0.93, 0.93, 0.91]	[0.93, 0.92, 0.93]	[0.89, 0.91, 0.92]	[0.91, 0.92, 0.87]	[0.92, 0.92, 0.87]	[0.87, 0.91, 0.91]	[0.29, 0.29, 0.3]
72	DDG	random_35	dft_steric_fingerprint	test	[0.63, 0.65, 0.69]	[0.62, 0.67, 0.64]	[0.82, 0.74, 0.78]	[0.67, 0.7, 0.72]	[0.54, 0.59, 0.59]	[0.82, 0.74, 0.79]	[-0.06, -0.1, -0.18]
73	DDG	random_35	dft_steric_fingerprint	train	[0.93, 0.93, 0.94]	[0.92, 0.92, 0.93]	[0.93, 0.93, 0.93]	[0.93, 0.91, 0.93]	[0.91, 0.93, 0.9]	[0.9, 0.93, 0.93]	[0.27, 0.29, 0.3]
74	DDG	random_35	ecfp	test	[0.65, 0.67, 0.72]	[0.62, 0.66, 0.63]	[0.83, 0.74, 0.78]	[0.53, 0.52, 0.57]	[0.42, 0.46, 0.52]	[0.78, 0.68, 0.73]	[-0.06, -0.09, -0.15]
75	DDG	random_35	ecfp	train	[0.93, 0.93, 0.93]	[0.93, 0.93, 0.94]	[0.93, 0.94, 0.94]	[0.93, 0.91, 0.93]	[0.9, 0.92, 0.92]	[0.92, 0.92, 0.92]	[0.26, 0.24, 0.3]
76	DDG	random_35	ohe	test	[0.57, 0.6, 0.64]	[0.63, 0.66, 0.64]	[0.78, 0.73, 0.73]	[0.52, 0.55, 0.55]	[0.4, 0.44, 0.43]	[0.6, 0.49, 0.57]	[-0.23, -0.2, -0.26]
77	DDG	random_35	ohe	train	[0.89, 0.88, 0.89]	[0.9, 0.89, 0.88]	[0.85, 0.86, 0.86]	[0.51, 0.52, 0.51]	[0.52, 0.54, 0.51]	[0.51, 0.5, 0.51]	[0.26, 0.26, 0.26]
78	DDG	random_35	smiles_steric_fingerprint	test	[0.64, 0.65, 0.71]	[0.63, 0.66, 0.65]	[0.83, 0.76, 0.79]	[0.64, 0.68, 0.71]	[0.55, 0.58, 0.59]	[0.82, 0.73, 0.74]	[-0.11, -0.11, -0.2]
79	DDG	random_35	smiles_steric_fingerprint	train	[0.93, 0.95, 0.94]	[0.95, 0.95, 0.94]	[0.94, 0.94, 0.94]	[0.92, 0.94, 0.94]	[0.94, 0.94, 0.94]	[0.94, 0.94, 0.91]	[0.32, 0.3, 0.3]

## Sheet: obj3
	target	ligand_descr	dataset	SM1	SM2	SM3	SM7	SM8
0	Conversion	dft_nbd_model	test	[0.74, 0.72, 0.73]	[0.7, 0.72, 0.69]	[0.82, 0.8, 0.78]	[0.77, 0.81, 0.72]	[0.63, 0.72, 0.73]
1	Conversion	dft_nbd_model	train	[1.0, 1.0, 1.0]	[0.93, 0.92, 0.99]	[0.88, 0.89, 0.9]	[0.98, 1.0, 0.97]	[0.99, 1.0, 1.0]
2	Conversion	ecfp	test	[0.67, 0.72, 0.63]	[0.7, 0.63, 0.7]	[0.77, 0.77, 0.7]	[0.62, 0.53, 0.73]	[0.64, 0.62, 0.69]
3	Conversion	ecfp	train	[0.95, 0.84, 0.98]	[0.9, 0.88, 0.87]	[0.88, 0.93, 0.93]	[0.84, 0.84, 0.9]	[0.95, 0.86, 0.91]
4	Conversion	ohe	test	[0.5, 0.5, 0.5]	[0.5, 0.5, 0.5]	[0.5, 0.5, 0.5]	[0.5, 0.5, 0.5]	[0.5, 0.5, 0.5]
5	Conversion	ohe	train	[0.5, 0.5, 0.5]	[0.5, 0.5, 0.5]	[0.5, 0.5, 0.5]	[0.5, 0.5, 0.5]	[0.5, 0.5, 0.5]
6	Conversion	random	test	[0.41, 0.54, 0.57]	[0.45, 0.36, 0.64]	[0.36, 0.61, 0.47]	[0.54, 0.58, 0.51]	[0.67, 0.46, 0.55]
7	Conversion	random	train	[1.0, 1.0, 0.99]	[1.0, 1.0, 1.0]	[1.0, 1.0, 1.0]	[1.0, 1.0, 1.0]	[1.0, 1.0, 1.0]
8	Conversion	random_35	test	[0.67, 0.59, 0.52]	[0.48, 0.48, 0.37]	[0.64, 0.54, 0.49]	[0.46, 0.47, 0.58]	[0.44, 0.52, 0.57]
9	Conversion	random_35	train	[1.0, 1.0, 1.0]	[1.0, 1.0, 1.0]	[1.0, 1.0, 1.0]	[1.0, 1.0, 1.0]	[1.0, 1.0, 1.0]
10	DDG	dft_nbd_model	test	[0.12, 0.06, 0.08]	[0.18, 0.09, 0.14]	[0.12, 0.07, 0.14]	[0.22, 0.23, -0.19]	[-0.05, 0.13, -0.14]
11	DDG	dft_nbd_model	train	[0.91, 0.63, 0.64]	[0.63, 0.57, 0.63]	[0.93, 0.92, 0.64]	[0.94, 0.72, 0.77]	[0.51, 0.88, 0.71]
12	DDG	ecfp	test	[-0.0, -0.05, -0.03]	[-0.01, -0.07, -0.04]	[0.01, -0.02, -0.08]	[0.09, -0.08, 0.08]	[-0.06, -0.04, 0.01]
13	DDG	ecfp	train	[0.06, 0.07, 0.12]	[0.06, 0.07, 0.06]	[0.14, 0.33, 0.29]	[0.4, 0.5, 0.52]	[0.08, 0.41, 0.08]
14	DDG	ohe	test	[-0.02, -0.04, -0.02]	[-0.04, -0.05, -0.02]	[-0.0, -0.0, -0.03]	[-0.01, -0.01, -0.0]	[-0.05, -0.0, -0.01]
15	DDG	ohe	train	[0.0, 0.0, 0.0]	[0.0, 0.0, 0.0]	[0.0, 0.0, 0.0]	[0.0, 0.0, 0.0]	[0.0, 0.0, 0.0]
16	DDG	random	test	[-0.03, -0.01, -0.11]	[-0.04, -0.08, 0.07]	[0.03, -0.06, -0.07]	[-0.05, -0.04, 0.03]	[-0.01, -0.08, -0.0]
17	DDG	random	train	[0.69, 0.7, 0.65]	[0.72, 0.55, 0.94]	[0.72, 0.96, 0.92]	[0.76, 0.55, 0.67]	[0.68, 0.67, 0.64]
18	DDG	random_35	test	[-0.12, -0.1, -0.01]	[-0.02, -0.11, -0.06]	[-0.12, -0.16, -0.17]	[-0.13, -0.12, -0.03]	[-0.16, -0.11, -0.21]
19	DDG	random_35	train	[0.68, 0.64, 0.61]	[0.67, 0.63, 0.66]	[0.72, 0.54, 0.55]	[0.55, 0.95, 0.51]	[0.48, 0.61, 0.48]

## Sheet: obj4
	target	ligand_descr	sm	score	seed	fraction
0	DDG	dft_nbd_model	SM1	0.959551	398	0.1
1	DDG	dft_nbd_model	SM2	0.701214	672	0.1
2	DDG	dft_nbd_model	SM3	0.94078	830	0.1
3	DDG	dft_nbd_model	SM7	0.8351	661	0.1
4	DDG	dft_nbd_model	SM8	0.861272	147	0.1
5	DDG	ecfp	SM1	0.624172	418	0.2
6	DDG	ecfp	SM2	0.447072	410	0.1
7	DDG	ecfp	SM3	0.626293	240	0.1
8	DDG	ecfp	SM7	0.924063	853	0.1
9	DDG	ecfp	SM8	0.606066	924	0.3
10	DDG	random_50	SM1	0.84007	697	0.1
11	DDG	random_50	SM2	0.856407	211	0.1
12	DDG	random_50	SM3	0.630472	594	0.1
13	DDG	random_50	SM7	0.68213	320	0.2
14	DDG	random_50	SM8	0.627902	798	0.1
15	Conversion	dft_nbd_model	SM1	0.758492	658	0.5
16	Conversion	dft_nbd_model	SM2	0.760525	838	0.6
17	Conversion	dft_nbd_model	SM3	0.808966	470	0.7
18	Conversion	dft_nbd_model	SM7	0.801526	791	0.7
19	Conversion	dft_nbd_model	SM8	0.752709	891	0.4
20	Conversion	ecfp	SM1	0.403239	577	0.3
21	Conversion	ecfp	SM2	0.466825	540	0.2
22	Conversion	ecfp	SM3	0.454114	758	0.6
23	Conversion	ecfp	SM7	0.500815	325	0.5
24	Conversion	ecfp	SM8	0.401247	305	0.5
25	Conversion	random_50	SM1	0.565415	384	0.1
26	Conversion	random_50	SM2	0.576464	666	0.1
27	Conversion	random_50	SM3	0.514555	163	0.1
28	Conversion	random_50	SM7	0.631158	577	0.1
29	Conversion	random_50	SM8	0.707377	654	0.1
